# Supplementary material
Source: ML conference proceedings conference paper supplement (https://proceedings.mlr.press/v80/nguyen18a.html)
Supplement: Supplementary file [file nguyen18a-supp.pdf]

---

# Optimization Landscape and Expressivity of Deep CNNs

---

Quynh Nguyen<sup>1</sup> Matthias Hein<sup>2</sup>

## Abstract

We analyze the loss landscape and expressiveness of practical deep convolutional neural networks (CNNs) with shared weights and max pooling layers. We show that such CNNs produce linearly independent features at a “wide” layer which has more neurons than the number of training samples. This condition holds e.g. for the VGG network. Furthermore, we provide for such wide CNNs necessary and sufficient conditions for global minima with zero training error. For the case where the wide layer is followed by a fully connected layer we show that almost every critical point of the empirical loss is a global minimum with zero training error. Our analysis suggests that both depth and width are very important in deep learning. While depth brings more representational power and allows the network to learn high level features, width smoothes the optimization landscape of the loss function in the sense that a sufficiently wide network has a well-behaved loss surface with almost no bad local minima.

## 1. Introduction

It is well known that the optimization problem for training neural networks can have exponentially many local minima (Auer et al., 1996; Safran & Shamir, 2016) and NP-hardness has been shown in many cases (Blum & Rivest., 1989; Sima, 2002; Livni et al., 2014; Shamir, 2017; Shalev-Shwartz et al., 2017). However, it has been empirically observed (Dauphin et al., 2014; Goodfellow et al., 2015) that the training of state-of-the-art deep CNNs (LeCun et al., 1990; Krizhevsky et al., 2012), which are often overparameterized, is not hampered by suboptimal local minima.

In order to explain the apparent gap between hardness results and practical performance, many interesting theoret-

---

<sup>1</sup>Department of Mathematics and Computer Science, Saarland University, Germany <sup>2</sup>University of Tübingen, Germany. Correspondence to: Quynh Nguyen <quynh@cs.uni-saarland.de>.

Table 1. The maximum width of all layers in several state-of-the-art CNN architectures compared with the size of ImageNet dataset ( $N \approx 1200K$ ). All numbers are lower bounds on the true width.

| CNN ARCHITECTURE                      | $M = \max_k n_k$  | $M > N$ |
|---------------------------------------|-------------------|---------|
| VGG(A-E) (SIMONYAN & ZISSERMAN, 2015) | 3000K ( $k = 1$ ) | YES     |
| INCEPTIONV3 (SZEGEDY ET AL., 2015B)   | 1300K ( $k = 3$ ) | YES     |
| INCEPTIONV4 (SZEGEDY ET AL., 2016)    | 1300K ( $k = 3$ ) | YES     |
| SQUEEZE NET (IANDOLA ET AL., 2016)    | 1180K ( $k = 1$ ) | NO      |
| ENET (PASZKE ET AL., 2016)            | 1000K ( $k = 1$ ) | NO      |
| GOOGLE NET (SZEGEDY ET AL., 2015A)    | 800K ( $k = 1$ )  | NO      |
| RESNET (HE ET AL., 2016)              | 800K ( $k = 1$ )  | NO      |
| XCEPTION (CHOLLET, 2016)              | 700K ( $k = 1$ )  | NO      |

ical results have been recently developed (Andoni et al., 2014; Sedghi & Anandkumar, 2015; Janzamin et al., 2016; Haeffele & Vidal, 2017; Gautier et al., 2016; Brutzkus & Globerson, 2017; Soltanolkotabi, 2017; Zhong et al., 2017; Tian, 2017; Du et al., 2018) in order to identify conditions under which one can guarantee that local search algorithms like gradient descent converge to the globally optimal solution. However, it turns out that these approaches are either not practical as they require e.g. knowledge about the data generating measure, or a modification of network structure and objective, or they are for quite restricted network structures, mostly one hidden layer networks, and thus are not able to explain the success of deep networks in general. For deep linear networks one has achieved a quite complete picture of the loss surface as it has been shown that every local minimum is a global minimum (Baldi & Hornik, 1988; Kawaguchi, 2016; Freeman & Bruna, 2017; Hardt & Ma, 2017; Yun et al., 2018). By randomizing the nonlinear part of a feedforward network with ReLU activation function and making some additional simplifying assumptions, (Choromanska et al., 2015a) can relate the loss surface of neural networks to a certain spin glass model. In this model the objective of local minima is close to the global optimum and the number of bad local minima decreases quickly with the distance to the global optimum. This is a very interesting result but is based on a number of unrealistic assumptions (Choromanska et al., 2015b). More recently, (Nguyen & Hein, 2017) have analyzed deep fully connected networks with general activation functions and could show that almost every critical point is a global minimum if one layer has more neurons than the number of training points. While this result holds for networks in practice, it requires a quite extensively overparameterized network.

In this paper we overcome the restriction of previous work in several ways. This paper is one of the first ones, which analyzes the loss surface of deep CNNs. CNNs are of high practical interest as they learn very useful representations (Zeiler & Fergus, 2014; Mahendran & Vedaldi, 2015; Yosinski et al., 2015) with small number of parameters. We are only aware of (Cohen & Shashua, 2016) who study the expressiveness of CNNs with max-pooling layer and ReLU activation but with rather unrealistic filters (just  $1 \times 1$ ) and no shared weights. In our setting we allow as well max pooling and general activation functions. Moreover, we can have an arbitrary number of filters and we study general convolutions as the filters need not be applied to regular structures like  $3 \times 3$  but can be patch-based where the only condition is that all the patches have the size of the filter. Convolutional layers, fully connected layers and max-pooling layers can be combined in almost arbitrary order. We study in this paper the expressiveness and loss surface of a CNN where one layer is wide, in the sense that it has more neurons than the number of training points. While this assumption sounds at first quite strong, we want to emphasize that the popular VGG (Simonyan & Zisserman, 2015) and Inception networks (Szegedy et al., 2015b; 2016), see Table 1, fulfill this condition. We show that wide CNNs produce linearly independent feature representations at the wide layer and thus are able to fit the training data exactly (universal finite sample expressivity). This is even true with probability one when all the parameters up to the wide layer are chosen randomly<sup>1</sup>. We think that this explains partially the results of (Zhang et al., 2017) where they show experimentally for several CNNs that they are able to fit random labels. Moreover, we provide necessary and sufficient conditions for global minima with zero squared loss and show for a particular class of CNNs that almost all critical points are globally optimal, which to some extent explains why wide CNNs can be optimized so efficiently. All proofs are moved to the appendix due to limited space.

## 2. Deep Convolutional Neural Networks

We first introduce our notation and definition of CNNs. Let  $N$  be the number of training samples and denote by  $X = [x_1, \dots, x_N]^T \in \mathbb{R}^{N \times d}$ ,  $Y = [y_1, \dots, y_N]^T \in \mathbb{R}^{N \times m}$  the input resp. output matrix for the training data  $(x_i, y_i)_{i=1}^N$ , where  $d$  is the input dimension and  $m$  the number of classes.

Let  $L$  be the number of layers of the network, where each layer is either a convolutional, max-pooling or fully connected layer. The layers are indexed from  $k = 0, 1, \dots, L$  which corresponds to input layer, 1st hidden layer,  $\dots$ , and output layer. Let  $n_k$  be the width of layer  $k$  and  $f_k : \mathbb{R}^d \rightarrow \mathbb{R}^{n_k}$  the function that computes for every input

<sup>1</sup>for any probability measure on the parameter space which has a density with respect to the Lebesgue measure

its feature vector at layer  $k$ .

The convolutional layer consists of a set of patches of equal size where every patch is a subset of neurons from the same layer. Throughout this paper, we assume that the patches of every layer cover the whole layer, *i.e.* every neuron belongs to at least one of the patches, and that there are no patches that contain exactly the same subset of neurons. This means that if one patch covers the whole layer then it must be the only patch of the layer. Let  $P_k$  and  $l_k$  be the number of patches resp. the size of each patch at layer  $k$  for every  $0 \leq k < L$ . For every input  $x \in \mathbb{R}^d$ , let  $\{x^1, \dots, x^{P_0}\} \in \mathbb{R}^{l_0}$  denote the set of patches at the input layer and  $\{f_k^1(x), \dots, f_k^{P_k}(x)\} \in \mathbb{R}^{l_k}$  the set of patches at layer  $k$ . Each filter of the layer consists of the same set of patches. We denote by  $T_k$  the number of convolutional filters and by  $W_k = [w_k^1, \dots, w_k^{T_k}] \in \mathbb{R}^{l_{k-1} \times T_k}$  the corresponding parameter matrix of the convolutional layer  $k$  for every  $1 \leq k < L$ . Each column of  $W_k$  corresponds to one filter. Furthermore,  $b_k \in \mathbb{R}^{n_k}$  denotes the bias vector and  $\sigma_k : \mathbb{R} \rightarrow \mathbb{R}$  the activation function for each layer. Note that one can use the same activation function for all layers but we use the general form to highlight the role of different layers. In this paper, all functions are applied component-wise, and we denote by  $[a]$  the set of integers  $\{1, 2, \dots, a\}$  and by  $[a, b]$  the set of integers from  $a$  to  $b$ .

**Definition 2.1 (Convolutional layer)** A layer  $k$  is called a convolutional layer if its output  $f_k(x) \in \mathbb{R}^{n_k}$  is defined for every  $x \in \mathbb{R}^d$  as

$$f_k(x)_h = \sigma_k \left( \langle w_k^t, f_{k-1}^p(x) \rangle + (b_k)_h \right) \quad (1)$$

for every  $p \in [P_{k-1}]$ ,  $t \in [T_k]$ ,  $h := (p-1)T_k + t$ .

The value of each neuron at layer  $k$  is computed by first taking the inner product between a filter of layer  $k$  and a patch at layer  $k-1$ , adding the bias and then applying the activation function. The number of neurons at layer  $k$  is thus  $n_k = T_k P_{k-1}$ , which we denote as the width of layer  $k$ . Our definition of a convolutional layer is quite general as every patch can be an arbitrary subset of neurons of the same layer and thus covers most of existing variants in practice.

Definition 2.1 includes the fully connected layer as a special case by using  $P_{k-1} = 1$ ,  $l_{k-1} = n_{k-1}$ ,  $f_{k-1}^1(x) = f_{k-1}(x) \in \mathbb{R}^{n_{k-1}}$ ,  $T_k = n_k$ ,  $W_k \in \mathbb{R}^{n_{k-1} \times n_k}$ ,  $b_k \in \mathbb{R}^{n_k}$ . Thus we have only one patch which is the whole feature vector at this layer.

**Definition 2.2 (Fully connected layer)** A layer  $k$  is called a fully connected layer if its output  $f_k(x) \in \mathbb{R}^{n_k}$  is defined for every  $x \in \mathbb{R}^d$  as

$$f_k(x) = \sigma_k \left( W_k^T f_{k-1}(x) + b_k \right). \quad (2)$$

For some results we also allow max-pooling layers.

**Definition 2.3 (Max-pooling layer)** A layer  $k$  is called a max-pooling layer if its output  $f_k(x) \in \mathbb{R}^{n_k}$  is defined for every  $x \in \mathbb{R}^d$  and  $p \in [P_{k-1}]$  as

$$f_k(x)_p = \max \left( (f_{k-1}^p(x))_1, \dots, (f_{k-1}^p(x))_{l_{k-1}} \right). \quad (3)$$

A max-pooling layer just computes the maximum element of every patch from the previous layer. Since there are  $P_{k-1}$  patches at layer  $k-1$ , the number of output neurons at layer  $k$  is  $n_k = P_{k-1}$ .

**Reformulation of Convolutional Layers:** For each convolutional or fully connected layer, we denote by  $\mathcal{M}_k : \mathbb{R}^{l_{k-1} \times T_k} \rightarrow \mathbb{R}^{n_{k-1} \times n_k}$  the linear map that returns for every parameter matrix  $W_k \in \mathbb{R}^{l_{k-1} \times T_k}$  the corresponding full weight matrix  $U_k = \mathcal{M}_k(W_k) \in \mathbb{R}^{n_{k-1} \times n_k}$ . For convolutional layers,  $U_k$  can be seen as the counterpart of the weight matrix  $W_k$  in fully connected layers. We define  $U_k = \mathcal{M}_k(W_k) = W_k$  if layer  $k$  is fully connected. Note that the mapping  $\mathcal{M}_k$  depends on the patch structure of each convolutional layer  $k$ . For example, suppose that layer  $k$  has

two filters of length 3, that is,  $W_k = [w_k^1, w_k^2] = \begin{bmatrix} a & d \\ b & e \\ c & f \end{bmatrix}$ ,

and  $n_{k-1} = 5$  and patches given by a 1D-convolution with stride 1 and no padding then:

$$U_k^T = \mathcal{M}_k(W_k)^T = \begin{bmatrix} a & b & c & 0 & 0 \\ d & e & f & 0 & 0 \\ 0 & a & b & c & 0 \\ 0 & d & e & f & 0 \\ 0 & 0 & a & b & c \\ 0 & 0 & d & e & f \end{bmatrix}.$$

The above ordering of the rows of  $U_k^T$  of a convolutional layer is determined by (1), in particular, the row index  $h$  of  $U_k^T$  is calculated as  $h = (p-1)T_k + t$ , which means for every given patch  $p$  one has to loop over all the filters  $t$  and compute the corresponding value of the output unit by taking the inner product of the  $h$ -th row of  $U_k^T$  with the whole feature vector of the previous layer. We assume throughout this paper that there is no non-linearity at the output layer. By ignoring max-pooling layers for the moment, the feature maps  $f_k : \mathbb{R}^d \rightarrow \mathbb{R}^{n_k}$  can be written as

$$f_k(x) = \begin{cases} x & k = 0 \\ \sigma_k(g_k(x)) & 1 \leq k \leq L-1 \\ g_L(x) & k = L \end{cases}$$

where  $g_k : \mathbb{R}^d \rightarrow \mathbb{R}^{n_k}$  is the pre-activation function:

$$g_k(x) = U_k^T f_{k-1}(x) + b_k, \quad \forall 1 \leq k \leq L$$

By stacking the feature vectors of layer  $k$  of all training samples, before and after applying the activation function, into a matrix, we define:

$$F_k = [f_k(x_1), \dots, f_k(x_N)]^T \in \mathbb{R}^{N \times n_k}, \\ G_k = [g_k(x_1), \dots, g_k(x_N)]^T \in \mathbb{R}^{N \times n_k}.$$

In this paper, we refer to  $F_k$  as the output matrix at layer  $k$ . It follows from above that

$$F_k = \begin{cases} X & k = 0 \\ \sigma_k(G_k) & 1 \leq k \leq L-1 \\ G_L & k = L \end{cases} \quad (4)$$

where  $G_k = F_{k-1}U_k + \mathbf{1}_N b_k^T$  for every  $1 \leq k \leq L$ .

In this paper, we assume the following general condition on the structure of convolutional layers.

**Assumption 2.4 (Convolutional Structure)** For every convolutional layer  $k$ , there exists at least one parameter matrix  $W_k \in \mathbb{R}^{l_{k-1} \times T_k}$  for which the corresponding weight matrix  $U_k = \mathcal{M}_k(W_k) \in \mathbb{R}^{n_{k-1} \times n_k}$  has full rank.

It is straightforward to see that Assumption 2.4 is satisfied if every neuron belongs to at least one patch and there are no identical patches. As the set of full rank matrices is a dense subset, the following result follows immediately.

**Lemma 2.5** If Assumption 2.4 holds, then for every convolutional layer  $k$ , the set of  $W_k \in \mathbb{R}^{l_{k-1} \times T_k}$  for which  $U_k = \mathcal{M}_k(W_k) \in \mathbb{R}^{n_{k-1} \times n_k}$  does not have full rank has Lebesgue measure zero.

### 3. CNN Learn Linearly Independent Features

In this section, we show that a class of standard CNN architectures with convolutional layers, fully connected layers and max-pooling layers plus standard activation functions like ReLU, sigmoid, softplus, etc are able to learn linearly independent features at every wide hidden layer if it has more neurons than the number of training samples. Our assumption on training data is the following.

**Assumption 3.1 (Training data)** The patches of different training samples are non-identical, that is,  $x_i^p \neq x_j^q$  for every  $p, q \in [P_0], i, j \in [N], i \neq j$ .

Assumption 3.1 is quite weak, especially if the size of the input patches is large. If the assumption does not hold, one can add a small perturbation to the training samples:  $\{x_1 + \epsilon_1, \dots, x_N + \epsilon_N\}$ . The set of  $\{\epsilon_i\}_{i=1}^N$  where Assumption 3.1 is not fulfilled for the new dataset has measure zero. Moreover,  $\{\epsilon_i\}_{i=1}^N$  can be chosen arbitrarily small so that the influence of the perturbation is negligible. Our main assumptions on the activation function of the hidden layers are the following.

**Assumption 3.2 (Activation function)** *The activation function  $\sigma$  is continuous, non-constant, and satisfies one of the following conditions:*

- There exist  $\mu_+, \mu_- \in \mathbb{R}$  s.t.  $\lim_{t \rightarrow -\infty} \sigma_k(t) = \mu_-$  and  $\lim_{t \rightarrow \infty} \sigma_k(t) = \mu_+$  and  $\mu_+ \mu_- = 0$
- There exist  $\rho_1, \rho_2, \rho_3, \rho_4 \in \mathbb{R}_+$  s.t.  $|\sigma(t)| \leq \rho_1 e^{\rho_2 t}$  for  $t < 0$  and  $|\sigma(t)| \leq \rho_3 t + \rho_4$  for  $t \geq 0$

Assumption 3.2 covers several standard activation functions.

**Lemma 3.3** *The following activation functions satisfy Assumption 3.2:*

- *ReLU*:  $\sigma(t) = \max(0, t)$
- *Sigmoid*:  $\sigma(t) = \frac{1}{1+e^{-t}}$
- *Softplus*:  $\sigma_\alpha(t) = \frac{1}{\alpha} \ln(1 + e^{\alpha t})$  for some  $\alpha > 0$

It is known that the softplus function is a smooth approximation of ReLU. In particular, it holds that:

$$\lim_{\alpha \rightarrow \infty} \sigma_\alpha(t) = \lim_{\alpha \rightarrow \infty} \frac{1}{\alpha} \ln(1 + e^{\alpha t}) = \max(0, t). \quad (5)$$

The first main result of this paper is the following.

**Theorem 3.4 (Linearly Independent Features)** *Let Assumption 3.1 hold for the training sample. Consider a deep CNN architecture for which there exists some layer  $1 \leq k \leq L - 1$  such that*

1. *Layer 1 and layer  $k$  are convolutional or fully connected while all the other layers can be convolutional, fully connected or max-pooling*
2. *The width of layer  $k$  is larger than the number of training samples,  $n_k = T_k P_{k-1} \geq N$*
3.  *$(\sigma_1, \dots, \sigma_k)$  satisfy Assumption 3.2*

*Then there exists a set of parameters of the first  $k$  layers  $(W_l, b_l)_{l=1}^k$  such that the set of feature vectors  $\{f_k(x_1), \dots, f_k(x_N)\}$  are linearly independent. Moreover,  $(W_l, b_l)_{l=1}^k$  can be chosen in such a way that all the weight matrices  $U_l = \mathcal{M}_l(W_l)$  have full rank for every  $1 \leq l \leq k$ .*

Theorem 3.4 implies that a large class of CNNs employed in practice with standard activation functions like ReLU, sigmoid or softplus can produce linearly independent features at any hidden layer if its width is larger than the size of training set. Figure 1 shows an example of a CNN architecture that satisfies the conditions of Theorem 3.4 at

the first convolutional layer. Note that if a set of vectors is linearly independent then they are also linearly separable. In this sense, Theorem 3.4 suggests that CNNs can produce linearly separable features at every wide hidden layer.

Linear separability in neural networks has been recently studied by (An et al., 2015), where the authors show that a two-hidden-layer fully connected network with ReLU activation function can transform any training set to be linearly separable while approximately preserving the distances of the training data at the output layer. Compared to (An et al., 2015) our Theorem 3.4 is derived for CNNs with a wider range of activation functions. Moreover, our result shows even linear independence of features which is stronger than linear separability. Recently, (Nguyen & Hein, 2017) have shown a similar result for fully connected networks and analytic activation functions.

We want to stress that, in contrast to fully connected networks, for CNNs the condition  $n_k \geq N$  of Theorem 3.4 does not imply that the network has a huge number of parameters as the layers  $k$  and  $k + 1$  can be chosen to be convolutional. In particular, the condition  $n_k = T_k P_{k-1} \geq N$  can be fulfilled by increasing the number of filters  $T_k$  or by using a large number of patches  $P_{k-1}$  (however  $P_{k-1}$  is upper bounded by  $n_k$ ), which is however only possible if  $l_{k-1}$  is small as otherwise our condition on the patches cannot be fulfilled. In total the CNN has only  $l_{k-1} T_k + l_k T_{k+1}$  parameters versus  $n_k(n_{k-1} + n_{k+1})$  for the fully connected network from and to layer  $k$ . Interestingly, the VGG-Net (Simonyan & Zisserman, 2015), where in the first layer small  $3 \times 3$  filters and stride 1 is used, fulfills for ImageNet the condition  $n_k \geq N$  for  $k = 1$ , as well as the Inception networks (Szegedy et al., 2015b; 2016), see Table 1.

One might ask now how difficult it is to find such parameters which generate linearly independent features at a hidden layer? Our next result shows that once analytic<sup>2</sup> activation functions, e.g. sigmoid or softplus, are used at the first  $k$  hidden layers of the network, the linear independence of features at layer  $k$  holds with probability 1 even if one draws the parameters of the first  $k$  layers  $(W_l, b_l)^k$  randomly for any probability measure on the parameter space which has a density with respect to the Lebesgue measure.

**Theorem 3.5** *Let Assumption 3.1 hold for the training samples. Consider a deep CNN for which there exists some layer  $1 \leq k \leq L - 1$  such that*

1. *Every layer from 1 to  $k$  is convolutional or fully connected*
2. *The width of layer  $k$  is larger than number of training*

<sup>2</sup>A function  $\sigma : \mathbb{R} \rightarrow \mathbb{R}$  is real analytic if its Taylor series about  $x_0$  converges to  $\sigma(x_0)$  on some neighborhood of  $x_0$  for every  $x_0 \in \mathbb{R}$  (Krantz & Parks, 2002).



samples, that is,  $n_k = T_k P_{k-1} \geq N$

3.  $(\sigma_1, \dots, \sigma_k)$  are real analytic functions and satisfy Assumption 3.2.

Then the set of parameters of the first  $k$  layers  $(W_l, b_l)_{l=1}^k$  for which the set of feature vectors  $\{f_k(x_1), \dots, f_k(x_N)\}$  are **not** linearly independent has Lebesgue measure **zero**.

Theorem 3.5 is a much stronger statement than Theorem 3.4, as it shows that for almost all weight configurations one gets linearly independent features at the wide layer. While Theorem 3.5 does not hold for the ReLU activation function as it is not an analytic function, we note again that one can approximate the ReLU function arbitrarily well using the softplus function (see 5), which is analytic function for any  $\alpha > 0$  and thus Theorem 3.5 applies. It is an open question if the result holds also for the ReLU activation function itself. The condition  $n_k \geq N$  is not very restrictive as several state-of-the art CNNs, see Table 1, fulfill the condition. Furthermore, we would like to stress that Theorem 3.5 is *not* true for deep linear networks. The reason is simply that the rank of a product of matrices can at most be the minimal rank among all the matrices. The nonlinearity of the activation function is thus critical (note that the identity activation function,  $\sigma(x) = x$ , does not fulfill Assumption 3.2).

To illustrate Theorem 3.5 we plot the rank of the feature matrices of the network in Figure 1. We use the MNIST dataset with  $N = 60000$  training and 10000 test samples. We add small Gaussian noise  $\mathcal{N}(0, 10^{-5})$  to every training sample so that Assumption 3.1 is fulfilled. We then vary the number of convolutional filters  $T_1$  of the first layer from 10 to 100 and train the corresponding network with squared loss and sigmoid activation function using Adam (Kingma & Ba, 2015) and decaying learning rate for 2000 epochs. In Table 2 we show the smallest singular value of the feature matrices together with the corresponding training loss, training and test error. If number of convolutional filters is large enough (*i.e.*  $T_1 \geq 89$ ), one has  $n_1 = 26 \times 26 \times T_1 \geq N = 60000$ , and the second condition of Theorem 3.5 is satisfied for  $k = 1$ . Table 2 shows that the feature matrices  $F_1$  have full rank in all cases (and  $F_3$  in almost all cases), in particular for  $T_1 \geq 89$  as shown in Theorem 3.5. As expected when the feature maps of the training samples are linearly independent after the first layer ( $F_1$  has rank 60000 for  $T \geq 89$ ) the training error is zero and the training loss is close to zero (the GPU uses single precision). However, as linear independence is stronger than linear separability one can achieve already for  $T < 89$  zero training error.

It is interesting to note that Theorem 3.5 explains previous empirical observations. In particular, (Czarnecki et al., 2017) have shown empirically that linear separability is often obtained already in the first few hidden layers of the

trained networks. This is done by attaching a linear classifier probe (Alain & Bengio, 2016) to every hidden layer in the network after training the whole network with back-propagation. The fact that Theorem 3.5 holds even if the parameters of the bottom layers up to the wide layer  $k$  are chosen randomly is also in line with recent empirical observations for CNN architectures that one has little loss in performance if the weights of the initial layers are chosen randomly without training (Jarrett et al., 2009; Saxe et al., 2011; Yosinski et al., 2014).

As a corollary of Theorem 3.4 we get the following universal finite sample expressivity for CNNs. In particular, a deep CNN with scalar output can perfectly fit any scalar-valued function for a finite number of inputs if the width of the last hidden layer is larger than the number of training samples.

### Corollary 3.6 (Universal Finite Sample Expressivity)

Let Assumption 3.1 hold for the training samples. Consider a standard CNN with scalar output which satisfies the conditions of Theorem 3.4 at the last hidden layer  $k = L - 1$ . Let  $f_L : \mathbb{R}^d \rightarrow \mathbb{R}$  be the output of the network given as

$$f_L(x) = \sum_{j=1}^{n_{L-1}} \lambda_j f_{(L-1)j}(x) \quad \forall x \in \mathbb{R}^d$$

where  $\lambda \in \mathbb{R}^{n_{L-1}}$  is the weight vector of the last layer. Then for every target  $y \in \mathbb{R}^N$ , there exists  $\{\lambda, (W_l, b_l)_{l=1}^{L-1}\}$  so that it holds  $f_L(x_i) = y_i$  for every  $i \in [N]$ .

The expressivity of neural networks has been well-studied, in particular in the universal approximation theorems for one hidden layer networks (Cybenko, 1989; Hornik et al., 1989). Recently, many results have shown why deep networks are superior to shallow networks in terms of expressiveness (Delalleau & Bengio, 2011; Telgarsky, 2016; 2015; Eldan & Shamir, 2016; Safran & Shamir, 2017; Yarotsky, 2016; Poggio et al., 2016; Liang & Srikant, 2017; Mhaskar & Poggio, 2016; Montufar et al., 2014; Pascanu et al., 2014; Raghu et al., 2017) While most of these results are derived for fully connected networks, it seems that (Cohen & Shashua, 2016) are the first ones who study expressivity of CNNs. In particular, they show that CNNs with max-pooling and ReLU units are universal in the sense that they can approximate any given function if the size of the networks is unlimited. However, the number of convolutional filters in this result has to grow exponentially with the number of patches and they do not allow shared weights in their result, which is a standard feature of CNNs. Corollary 3.6 shows universal finite sample expressivity, instead of universal function approximation, even for  $L = 2$  and  $k = 1$ , that is a single convolutional layer network can perfectly fit the training data as long as the number of hidden units is larger than the number of training samples.

For fully connected networks, universal finite sample ex-

Table 2. The smallest singular value  $\sigma_{\min}(F_1)$  of the feature matrix  $F_1$  of the first convolutional layer (similar  $\sigma_{\min}(F_3)$  for the feature matrix  $F_3$  of the second convolutional layer) of the trained network in Figure 1 are shown for varying number of convolutional filters  $T_1$ . The rank of a matrix  $A \in \mathbb{R}^{m \times n}$  is estimated (see Chapter 2.6.1 in (Press, 2007)) by computing the singular value decomposition of  $A$  and counting the singular values which exceed the threshold  $\frac{1}{2}\sqrt{m+n+1}\sigma_{\max}(A)\epsilon$ , where  $\epsilon$  is machine precision. For all filter sizes the feature matrices  $F_1$  have full rank. Zero training error is attained for  $T_1 \geq 30$ .

| $T_1$ | SIZE( $F_1$ )        | rank( $F_1$ ) | $\sigma_{\min}(F_1)$ | SIZE( $F_3$ )       | rank( $F_3$ ) | $\sigma_{\min}(F_3)$  | LOSS( $\times 10^{-5}$ ) | TRAIN ERROR | TEST ERROR |
|-------|----------------------|---------------|----------------------|---------------------|---------------|-----------------------|--------------------------|-------------|------------|
| 10    | 60000 $\times$ 6760  | <b>6760</b>   | $3.7 \times 10^{-6}$ | 60000 $\times$ 2880 | <b>2880</b>   | $2.0 \times 10^{-2}$  | 2.4                      | 8           | 151        |
| 20    | 60000 $\times$ 13520 | <b>13520</b>  | $2.2 \times 10^{-6}$ | 60000 $\times$ 2880 | <b>2880</b>   | $7.0 \times 10^{-4}$  | 1.2                      | 1           | 132        |
| 30    | 60000 $\times$ 20280 | <b>20280</b>  | $1.5 \times 10^{-6}$ | 60000 $\times$ 2880 | <b>2880</b>   | $2.4 \times 10^{-4}$  | 0.24                     | <b>0</b>    | 174        |
| 40    | 60000 $\times$ 27040 | <b>27040</b>  | $2.0 \times 10^{-6}$ | 60000 $\times$ 2880 | <b>2880</b>   | $2.2 \times 10^{-3}$  | 0.62                     | <b>0</b>    | 124        |
| 50    | 60000 $\times$ 33800 | <b>33800</b>  | $1.3 \times 10^{-6}$ | 60000 $\times$ 2880 | <b>2880</b>   | $3.9 \times 10^{-5}$  | 0.02                     | <b>0</b>    | 143        |
| 60    | 60000 $\times$ 40560 | <b>40560</b>  | $1.1 \times 10^{-6}$ | 60000 $\times$ 2880 | <b>2880</b>   | $4.0 \times 10^{-5}$  | 0.57                     | <b>0</b>    | 141        |
| 70    | 60000 $\times$ 47320 | <b>47320</b>  | $7.5 \times 10^{-7}$ | 60000 $\times$ 2880 | <b>2880</b>   | $7.1 \times 10^{-3}$  | 0.12                     | <b>0</b>    | 120        |
| 80    | 60000 $\times$ 54080 | <b>54080</b>  | $5.4 \times 10^{-7}$ | 60000 $\times$ 2880 | 2875          | $4.9 \times 10^{-18}$ | 0.11                     | <b>0</b>    | 140        |
| 89    | 60000 $\times$ 60164 | <b>60000</b>  | $2.0 \times 10^{-8}$ | 60000 $\times$ 2880 | <b>2880</b>   | $8.9 \times 10^{-10}$ | 0.35                     | <b>0</b>    | 117        |
| 100   | 60000 $\times$ 67600 | <b>60000</b>  | $1.1 \times 10^{-6}$ | 60000 $\times$ 2880 | 2856          | $8.5 \times 10^{-27}$ | 0.04                     | <b>0</b>    | 139        |

pressivity has been studied by (Zhang et al., 2017; Nguyen & Hein, 2017; Hardt & Ma, 2017). It is shown that a single hidden layer fully connected network with  $N$  hidden units can express any training set of size  $N$ . While the number of training parameters of a single hidden layer CNN with  $N$  hidden units and scalar output is just  $2N + T_1 l_0$ , where  $T_1$  is the number of convolutional filters and  $l_0$  is the size of each filter, it is  $Nd + 2N$  for fully connected networks. If we set the width of the hidden layer of the CNN as  $n_1 = T_1 P_0 = N$  in order to fulfill the condition of Corollary 3.6, then the number of training parameters of the CNN becomes  $2N + Nl_0/P_0$ , which is less than  $3N$  if  $l_0 \leq P_0$  compared to  $(d+2)N$  for the fully connected case. In practice one almost always has  $l_0 \leq P_0$  as  $l_0$  is typically a small integer and  $P_0$  is on the order of the dimension of the input. Thus, the number of parameters to achieve universal finite sample expressivity is for CNNs significantly smaller than for fully connected networks.

Obviously, in practice it is most important that the network generalizes rather than just fitting the training data. By using shared weights and sparsity structure, CNNs seem to implicitly regularize the model to achieve good generalization performance. Thus even though they can fit also random labels or noise (Zhang et al., 2017) due to the universal finite sample expressivity shown in Corollary 3.6, they seem still to be able to generalize well (Zhang et al., 2017).

## 4. Optimization Landscape of Deep CNNs

In this section, we restrict our analysis to the use of least squares loss. However, as we show later that the network can produce exactly the target output (*i.e.*  $F_L = Y$ ) for some choice of parameters, all our results can also be extended to any other loss function where the global minimum is attained at  $F_L = Y$ , for instance the squared Hinge-loss analyzed in (Nguyen & Hein, 2017). Let  $\mathcal{P}$  denote the space

of all parameters of the network. The final training objective  $\Phi : \mathcal{P} \rightarrow \mathbb{R}$  is given as

$$\Phi\left((W_l, b_l)_{l=1}^L\right) = \frac{1}{2} \|F_L - Y\|_F^2 \quad (6)$$

where  $F_L$  is defined as in (4), which is also the same as

$$F_L = \sigma_{L-1}(\dots \sigma_1(XU_1 + \mathbf{1}_N b_1^T) \dots) U_L + \mathbf{1}_N b_L^T,$$

where  $U_l = \mathcal{M}_l(W_l)$  for every  $1 \leq l \leq L$ . We require the following assumptions on the architecture of CNN.

**Assumption 4.1 (CNN Architecture)** *Every layer in the network is a convolutional layer or fully connected layer and the output layer is fully connected. Moreover, there exists some hidden layer  $1 \leq k \leq L - 1$  such that the following holds:*

- *The width of layer  $k$  is larger than number of training samples, that is,  $n_k = T_k P_{k-1} \geq N$*
- *All the activation functions of the hidden layers  $(\sigma_1, \dots, \sigma_{L-1})$  satisfy Assumption 3.2*
- *$(\sigma_{k+1}, \dots, \sigma_{L-1})$  are strictly increasing or strictly decreasing, and differentiable*
- *The network is pyramidal from layer  $k + 1$  till the output layer, that is,  $n_{k+1} \geq \dots \geq n_L$*

A typical example that satisfies Assumption 4.1 with  $k = 1$  can be found in Figure 1 where one disregards max-pooling layers and uses *e.g.* sigmoid or softplus activation function.

In the following, let us define for every  $1 \leq k \leq L - 1$  the subset  $S_k \subseteq \mathcal{P}$  of the parameter space such that

$$S_k := \{(W_l, b_l)_{l=1}^L \mid F_k, U_{k+2}, \dots, U_L \text{ have full rank}\}.$$

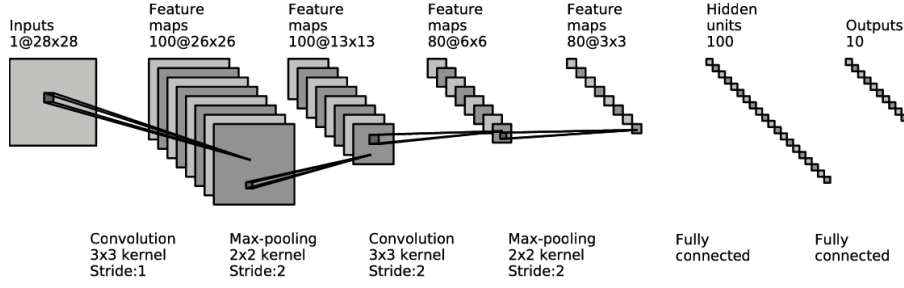

Figure 1. An example of CNN for a given training set of size  $N \leq 100 \times 26 \times 26 = 67600$ . The width of each layer is  $d = n_0 = 784$ ,  $n_1 = 67600$ ,  $n_2 = 16900$ ,  $n_3 = 2880$ ,  $n_4 = 720$ ,  $n_5 = 100$ ,  $n_6 = m = 10$ . One can see that  $n_1 \geq N$  and the network has pyramidal structure from layer 2 till the output layer, that is,  $n_2 \geq \dots \geq n_6$ .

The set  $S_k$  is the set of parameters where the feature matrix at layer  $k$  and all the weight matrices from layer  $k+2$  till the output layer have full rank. In the following, we examine conditions for global optimality in  $S_k$ . It is important to note that  $S_k$  covers almost the whole parameter space under an additional mild condition on the activation function.

**Lemma 4.2** *Let Assumption 3.1 hold for the training samples and a deep CNN satisfy Assumption 4.1 for some layer  $1 \leq k \leq L-1$ . If the activation functions of the first  $k$  layers  $(\sigma_1, \dots, \sigma_k)$  are real analytic, then the complementary set  $\mathcal{P} \setminus S_k$  has Lebesgue measure zero.*

In the next key lemma, we bound the objective function in terms of its gradient magnitude w.r.t. the weight matrix of layer  $k$  for which  $n_k \geq N$ . For every matrix  $A \in \mathbb{R}^{m \times n}$ , let  $\sigma_{\min}(A)$  and  $\sigma_{\max}(A)$  denote the smallest and largest singular value of  $A$ . Let  $\|A\|_F = \sqrt{\sum_{i,j} A_{ij}^2}$ ,  $\|A\|_{\min} := \min_{i,j} |A_{ij}|$  and  $\|A\|_{\max} := \max_{i,j} |A_{ij}|$ . From (4), and (6), it follows that  $\Phi$  can be seen as a function of  $(U_l, b_l)_{l=1}^L$ , and thus we can use  $\nabla_{U_k} \Phi$ . If layer  $k$  is fully connected then  $U_k = \mathcal{M}_k(W_k) = W_k$  and thus  $\nabla_{U_k} \Phi = \nabla_{W_k} \Phi$ . Otherwise, if layer  $k$  is convolutional then we note that  $\nabla_{U_k} \Phi$  is “not” the true gradient of the training objective because  $U_k$  is not the true optimization parameter but  $W_k$ . In this case, the true gradient of  $\Phi$  w.r.t. to the true parameter matrix  $W_k$  which consists of convolutional filters can be computed via the chain rule as

$$\frac{\partial \Phi}{\partial (W_k)_{rs}} = \sum_{i,j} \frac{\partial \Phi}{\partial (U_k)_{ij}} \frac{\partial (U_k)_{ij}}{\partial (W_k)_{rs}}$$

Please note that even though we write the partial derivatives with respect to the matrix elements,  $\nabla_{W_k} \Phi$  resp.  $\nabla_{U_k} \Phi$  are the matrices of the same dimension as  $W_k$  resp.  $U_k$  in the following.

**Lemma 4.3** *Consider a deep CNN satisfying Assumption*

4.1 for some hidden layer  $1 \leq k \leq L-1$ . Then it holds

$$\begin{aligned} & \|\nabla_{U_{k+1}} \Phi\|_F \\ & \geq \sigma_{\min}(F_k) \left( \prod_{l=k+1}^{L-1} \sigma_{\min}(U_{l+1}) \|\sigma'_l(G_l)\|_{\min} \right) \|F_L - Y\|_F \end{aligned}$$

and

$$\|\nabla_{U_{k+1}} \Phi\|_F \leq \sigma_{\max}(F_k) \left( \prod_{l=k+1}^{L-1} \sigma_{\max}(U_{l+1}) \|\sigma'_l(G_l)\|_{\max} \right) \|F_L - Y\|_F.$$

Our next main result is motivated by the fact that empirically when training over-parameterized neural networks with shared weights and sparsity structure like CNNs, there seem to be no problems with sub-optimal local minima. In many cases, even when training labels are completely random, local search algorithms like stochastic gradient descent can converge to a solution with almost zero training error (Zhang et al., 2017). To understand better this phenomenon, we first characterize in the following Theorem 4.4 the set of points in parameter space with zero loss, and then analyze in Theorem 4.5 the loss surface for a special case of the network. We emphasize that our results hold for standard deep CNNs with convolutional layers with shared weights and fully connected layers.

**Theorem 4.4 (Conditions for Zero Training Error)** *Let Assumption 3.1 hold for the training sample and suppose that the CNN architecture satisfies Assumption 4.1 for some hidden layer  $1 \leq k \leq L-1$ . Let  $\Phi : \mathcal{P} \rightarrow \mathbb{R}$  be defined as in (6). Given any point  $(W_l, b_l)_{l=1}^L \in S_k$ . Then it holds that  $\Phi((W_l, b_l)_{l=1}^L) = 0$  if and only if  $\nabla_{U_{k+1}} \Phi|_{(W_l, b_l)_{l=1}^L} = 0$ .*

**Proof:** If  $\Phi((W_l, b_l)_{l=1}^L) = 0$  then it follows from the upper bound of Lemma 4.3 that  $\nabla_{U_{k+1}} \Phi = 0$ . For reverse direction, one has  $(W_l, b_l)_{l=1}^L \in S_k$  and thus

$\text{rank}(F_k) = N$  and  $U_l$  has full rank for every  $l \in [k+2, L]$ . Thus it holds  $\sigma_{\min}(F_k) > 0$  and  $\sigma_{\min}(U_l) > 0$  for every  $l \in [k+2, L]$ . Moreover,  $(\sigma_{k+1}, \dots, \sigma_{L-1})$  have non-zero derivative by Assumption 4.1 and thus  $\|\sigma'_l(G_l)\|_{\min} > 0$  for every  $l \in [k+1, L-1]$ . This combined with the lower bound in Lemma 4.3 leads to  $\Phi\left(W_l, b_l\right)_{l=1}^L = \|F_L - Y\|_F = 0$ .  $\square$

Lemma 4.2 shows that the set of points which are not covered by Theorem 4.4 has measure zero if the first  $k$  layers have analytic activation functions. The necessary and sufficient condition of Theorem 4.4 is rather intuitive as it requires the gradient of the training objective to vanish w.r.t. the full weight matrix of layer  $k+1$  regardless of the architecture of this layer. It turns out that if layer  $k+1$  is fully connected, then this condition is always satisfied at a critical point, in which case we obtain that every critical point in  $S_k$  is a global minimum with exact zero training error. This is shown in the next Theorem 4.5, where we consider a classification task with  $m$  classes,  $Z \in \mathbb{R}^{m \times m}$  is the full rank class encoding matrix e.g. the identity matrix and  $(X, Y)$  the training sample such that  $Y_{i\cdot} = Z_{j\cdot}$ : whenever the training sample  $x_i$  belongs to class  $j$  for every  $i \in [N], j \in [m]$ .

**Theorem 4.5 (Loss Surface of CNNs)** *Let  $(X, Y, Z)$  be a training set for which Assumption 3.1 holds, the CNN architecture satisfies Assumption 4.1 for some hidden layer  $1 \leq k \leq L-1$ , and layer  $k+1$  is fully connected. Let  $\Phi : \mathcal{P} \rightarrow \mathbb{R}$  be defined as in (6). Then the following holds*

- Every critical point  $(W_l, b_l)_{l=1}^L \in S_k$  is a global minimum with  $\Phi\left((W_l, b_l)_{l=1}^L\right) = 0$
- There exist infinitely many global minima  $(W_l, b_l)_{l=1}^L \in S_k$  with  $\Phi\left((W_l, b_l)_{l=1}^L\right) = 0$

Theorem 4.5 shows that the loss surface for this type of CNNs has a rather simple structure in the sense that every critical point in  $S_k$  must be a global minimum with zero training error. Note that if the activation functions up to layer  $k$  are analytic, the complement of  $S_k$  has measure zero (see Lemma 4.2). For those critical points lying outside  $S_k$ , it must hold that either one of the weight matrices  $\{U_{k+2}, \dots, U_L\}$  has low rank or the set of feature vectors at layer  $k$  is not linearly independent (i.e.  $F_k$  has low rank). Obviously, some of these critical points can also be global minima, but we conjecture that they cannot be suboptimal local minima due to the following reasons. First, it seems unlikely that a critical point with a low rank weight matrix is a suboptimal local minimum as this would imply that all possible full rank perturbations of the current solution must have larger/equal objective value. However, there is no term

in the loss function which favors low rank solutions. Even for linear networks, it has been shown by (Baldi & Hornik, 1988) that all the critical points with low rank weight matrices have to be saddle points and thus cannot be suboptimal local minima. Second, a similar argument applies to the case where one has a critical point outside  $S_k$  such that the features are not linearly independent. In particular, any neighborhood of such a critical point contains points which have linearly independent features at layer  $k$ , from which it is easy to reach zero loss if one fixes the parameters of the first  $k$  layers and optimizes the loss w.r.t. the remaining ones. This implies that every small neighborhood of the critical point should contain points from which there exists a descent path that leads to a global minimum with zero loss, which contradicts the fact that the critical point is a suboptimal local minimum. In summary, if there are critical points lying outside the set  $S_k$ , then it is very “unlikely” that these are suboptimal local minima but rather also global minima, saddle points or local maxima.

It remains an interesting open problem if the result of Theorem 4.5 can be transferred to the case where layer  $k+1$  is also convolutional. In any case whether layer  $k+1$  is fully connected or not, one might assume that a solution with zero training error still exists as it is usually the case for practical over-parameterized networks. However, note that Theorem 4.4 shows that at those points where the loss is zero, the gradient of  $\Phi$  w.r.t.  $U_{k+1}$  must be zero as well.

An interesting special case of Theorem 4.5 is when the network is fully connected in which case all the results of Theorem 4.5 hold without any modifications. This can be seen as a formal proof for the implicit assumption used in the recent work (Nguyen & Hein, 2017) that there exists a global minimum with absolute zero training error for the class of fully connected, deep and wide networks.

## 5. Conclusion

We have analyzed the expressiveness and loss surface of CNNs in realistic and practically relevant settings. As state-of-the-art networks fulfill exactly or approximately the condition to have a sufficiently wide convolutional layer, we think that our results help to understand why current CNNs can be trained so effectively. It would be interesting to discuss the loss surface for cross-entropy loss, which currently does not fit into our analysis as the global minimum does not exist when the data is linearly separable.

## Acknowledgements

The authors would like to thank the reviewers for their helpful comments on the paper and Maksym Andriushchenko for helping us to set up the experiment on the rank of features.



## References

- Alain, G. and Bengio, Y. Understanding intermediate layers using linear classifier probes. In *ICLR Workshop*, 2016.
- An, S., Boussaid, F., and Bannamoun, M. How can deep rectifier networks achieve linear separability and preserve distances? In *ICML*, 2015.
- Andoni, A., Panigrahy, R., Valiant, G., and Zhang, L. Learning polynomials with neural networks. In *ICML*, 2014.
- Auer, P., Herbster, M., and Warmuth, M. K. Exponentially many local minima for single neurons. In *NIPS*, 1996.
- Baldi, P. and Hornik, K. Neural networks and principle component analysis: Learning from examples without local minima. *Neural Networks*, 2:53–58, 1988.
- Blum, A. and Rivest, R. L. Training a 3-node neural network is np-complete. In *NIPS*, 1989.
- Brutzkus, A. and Globerson, A. Globally optimal gradient descent for a convnet with gaussian inputs. In *ICML*, 2017.
- Chollet, F. Xception: Deep learning with depthwise separable convolutions, 2016. arXiv:1610.02357.
- Choromanska, A., Hena, M., Mathieu, M., Arous, G. B., and LeCun, Y. The loss surfaces of multilayer networks. In *AISTATS*, 2015a.
- Choromanska, A., LeCun, Y., and Arous, G. B. Open problem: The landscape of the loss surfaces of multilayer networks. *COLT*, 2015b.
- Cohen, N. and Shashua, A. Convolutional rectifier networks as generalized tensor decompositions. In *ICML*, 2016.
- Cybenko, G. Approximation by superpositions of a sigmoidal function. *Mathematics of Control, Signals, and Systems*, 2:303–314, 1989.
- Czarnecki, W. M., Swirszcz, G., Jaderberg, M., Osindero, S., Vinyals, O., and Kavukcuoglu, K. Understanding synthetic gradients and decoupled neural interfaces. In *ICML*, 2017.
- Dauphin, Y., Pascanu, R., Gulcehre, C., Cho, K., Ganguli, S., and Bengio, Y. Identifying and attacking the saddle point problem in high-dimensional non-convex optimization. In *NIPS*, 2014.
- Delalleau, O. and Bengio, Y. Shallow vs. deep sum-product networks. In *NIPS*, 2011.
- Du, S. S., Lee, J. D., and Tian, Y. When is a convolutional filter easy to learn? In *ICLR*, 2018.
- Eldan, R. and Shamir, O. The power of depth for feedforward neural networks. In *COLT*, 2016.
- Freeman, C. D. and Bruna, J. Topology and geometry of half-rectified network optimization. In *ICLR*, 2017.
- Gautier, A., Nguyen, Q., and Hein, M. Globally optimal training of generalized polynomial neural networks with nonlinear spectral methods. In *NIPS*, 2016.
- Goodfellow, I. J., Vinyals, O., and Saxe, A. M. Qualitatively characterizing neural network optimization problems. In *ICLR*, 2015.
- Haeffele, B. D. and Vidal, R. Global optimality in neural network training. In *CVPR*, 2017.
- Hardt, M. and Ma, T. Identity matters in deep learning. In *ICLR*, 2017.
- He, K., Zhang, X., Ren, S., and Sun, J. Deep residual learning for image recognition. In *CVPR*, 2016.
- Hornik, K., Stinchcombe, M., and White, H. Multilayer feedforward networks are universal approximators. *Neural Networks*, 2:359–366, 1989.
- Iandola, F. N., Han, S., Moskewicz, M. W., Ashraf, K., Dally, W. J., and Keutzer, K. Squeezenet: Alexnet-level accuracy with 50x fewer parameters and < 0.5mb model size, 2016. arXiv:1602.07360.
- Janzamin, M., Sedghi, H., and Anandkumar, A. Beating the perils of non-convexity: Guaranteed training of neural networks using tensor methods. arXiv:1506.08473, 2016.
- Jarrett, K., Kavukcuoglu, K., and LeCun, Y. What is the best multi-stage architecture for object recognition? In *CVPR*, 2009.
- Kawaguchi, K. Deep learning without poor local minima. In *NIPS*, 2016.
- Kingma, D. P. and Ba, J. L. Adam: A method for stochastic optimization. In *ICLR*, 2015.
- Krantz, S. G. and Parks, H. R. *A Primer of Real Analytic Functions*. Birkhäuser, Boston, second edition, 2002.
- Krizhevsky, A., Sutskever, I., and Hinton, G. E. Imagenet classification with deep convolutional neural networks. In *NIPS*, 2012.
- LeCun, Y., Boser, B., Denker, J.S., Henderson, D., Howard, R.E., Hubbard, W., and Jackel, L.D. Handwritten digit recognition with a back-propagation network. In *NIPS*, 1990.
- Liang, S. and Srikant, R. Why deep neural networks for function approximation? In *ICLR*, 2017.

- Livni, R., Shalev-Shwartz, S., and Shamir, O. On the computational efficiency of training neural networks. In *NIPS*, 2014.
- Mahendran, A. and Vedaldi, A. Understanding deep image representations by inverting them. In *CVPR*, 2015.
- Mhaskar, H. and Poggio, T. Deep vs. shallow networks : An approximation theory perspective, 2016. arXiv:1608.03287.
- Mityagin, B. The zero set of a real analytic function, 2015. arXiv:1512.07276.
- Montufar, G., Pascanu, R., Cho, K., and Bengio, Y. On the number of linear regions of deep neural networks. In *NIPS*, 2014.
- Nguyen, Q. and Hein, M. The loss surface of deep and wide neural networks. In *ICML*, 2017.
- Nguyen, V. D. Complex powers of analytic functions and meromorphic renormalization in qft, 2015. arXiv:1503.00995.
- Pascanu, R., Montufar, G., and Bengio, Y. On the number of response regions of deep feedforward networks with piecewise linear activations. In *ICLR*, 2014.
- Paszke, A., Chaurasia, A., Kim, S., and Culurciello, E. Enet: A deep neural network architecture for real-time semantic segmentation, 2016. arXiv:1606.02147.
- Poggio, T., Mhaskar, H., Rosasco, L., Miranda, B., and Liao, Q. Why and when can deep – but not shallow – networks avoid the curse of dimensionality: a review, 2016. arXiv:1611.00740.
- Press, W. H. *Numerical Recipes: The art of scientific computing*. Cambridge University Press, 2007.
- Raghu, M., Poole, B., Kleinberg, J., Ganguli, S., and Sohl-Dickstein, J. On the expressive power of deep neural networks. In *ICML*, 2017.
- Safran, I. and Shamir, O. On the quality of the initial basin in overspecified networks. In *ICML*, 2016.
- Safran, I. and Shamir, O. Depth-width tradeoffs in approximating natural functions with neural networks. In *ICML*, 2017.
- Saxe, A., Koh, P. W., Chen, Z., Bhand, M., Suresh, B., and Ng, A. Y. On random weights and unsupervised feature learning. In *ICML*, 2011.
- Sedghi, H. and Anandkumar, A. Provable methods for training neural networks with sparse connectivity. In *ICLR Workshop*, 2015.
- Shalev-Shwartz, S., Shamir, O., and Shammah, S. Failures of gradient-based deep learning. In *ICML*, 2017.
- Shamir, O. Distribution-specific hardness of learning neural networks, 2017. arXiv:1609.01037.
- Sima, J. Training a single sigmoidal neuron is hard. *Neural Computation*, 14:2709–2728, 2002.
- Simonyan, K. and Zisserman, A. Very deep convolutional networks for large-scale image recognition. In *ICLR*, 2015.
- Soltanolkotabi, M. Learning relu via gradient descent. In *NIPS*, 2017.
- Szegedy, C., Liu, W., Jia, Y., Sermanet, P., Reed, S., Anguelov, D., Erhan, D., Vanhoucke, V., and Rabinovich, A. Going deeper with convolutions. In *CVPR*, 2015a.
- Szegedy, C., Vanhoucke, V., Ioffe, S., Shlens, J., and Wojna, Z. Rethinking the inception architecture for computer vision, 2015b. arXiv:1512.00567.
- Szegedy, C., Ioffe, S., Vanhoucke, V., and Alemi, A. Inception-v4, inception-resnet and the impact of residual connections on learning, 2016. arXiv:1602.07261.
- Telgarsky, M. Representation benefits of deep feedforward networks, 2015. arXiv:1509.08101v2.
- Telgarsky, M. Benefits of depth in neural networks. In *COLT*, 2016.
- Tian, Y. An analytical formula of population gradient for two-layered relu network and its applications in convergence and critical point analysis. In *ICML*, 2017.
- Yarotsky, D. Error bounds for approximations with deep relu networks, 2016. arXiv:1610.01145.
- Yosinski, J., Clune, J., Bengio, Y., and Lipson, H. How transferable are features in deep neural networks? In *NIPS*, 2014.
- Yosinski, J., Clune, J., Nguyen, A., Fuchs, T., and Lipson, H. Understanding neural networks through deep visualization. In *ICML*, 2015.
- Yun, C., Sra, S., and Jadbabaie, A. Global optimality conditions for deep neural networks. In *ICLR*, 2018.
- Zeiler, M. D. and Fergus, R. Visualizing and understanding convolutional networks. In *ECCV*, 2014.
- Zhang, C., Bengio, S., Hardt, M., Recht, B., and Vinyals, Oriol. Understanding deep learning requires re-thinking generalization. In *ICLR*, 2017.
- Zhong, K., Song, Z., Jain, P., Bartlett, P., and Dhillon, I. Recovery guarantees for one-hidden-layer neural networks. In *ICML*, 2017.

## A. Tools

The following key property of real analytic functions is helpful to prove our Theorem 3.5 and Lemma 2.5.

**Lemma A.1** (Nguyen, 2015; Mityagin, 2015) *If  $f : \mathbb{R}^n \rightarrow \mathbb{R}$  is a real analytic function which is not identically zero then the set  $\{x \in \mathbb{R}^n \mid f(x) = 0\}$  has Lebesgue measure zero.*

## B. Proof of Lemma 2.5

Since  $U_k = \mathcal{M}_k(W_k) \in \mathbb{R}^{n_{k-1} \times n_k}$  and  $\mathcal{M}_k$  is a linear map, every entry of  $U_k$  is a linear function of the entries of  $W_k$ . Let  $m = \min(n_{k-1}, n_k)$ , then the set of low rank matrices  $U_k$  is characterized by a system of equations where the  $\binom{\max(n_{k-1}, n_k)}{m}$  determinants of all  $m \times m$  sub-matrices of  $U_k$  are zero. As the determinant is a polynomial in the entries of the matrix and thus a real analytic function, and the composition of analytic functions is again analytic, we get that each determinant is a real analytic function of  $W_k$ . By Assumption 2.4, there exists at least one  $W_k$  such that one of these determinants is non-zero. Thus by Lemma A.1, the set of  $W_k$  where this determinant is zero has Lebesgue measure zero. As all the submatrices need to have low rank in order that  $U_k$  has low rank, we get that the set of  $W_k$  where  $U_k$  has low rank has Lebesgue measure zero.

## C. Proof of Lemma 3.3

- ReLU: It holds for every  $t < 0$  that  $\sigma(t) = \max(0, t) = 0 < e^t$ , and for  $t \geq 0$  that  $\sigma(t) = t < t + 1$ . Thus ReLU satisfies the second condition of Assumption 3.2.
- Sigmoid: It holds that

$$\lim_{t \rightarrow -\infty} \frac{1}{1 + e^{-t}} = 0, \quad \lim_{t \rightarrow \infty} \frac{1}{1 + e^{-t}} = 1.$$

Thus  $\sigma$  satisfies the first condition of Assumption 3.2.

- Softplus: Since  $1 + e^{\alpha t} \leq 2e^{\alpha t}$  for every  $t \geq 0$ , it holds for every  $t \geq 0$  that

$$\begin{aligned} 0 \leq \sigma_\alpha(t) &= \frac{1}{\alpha} \log(1 + e^{\alpha t}) \\ &\leq \frac{1}{\alpha} \log(2e^{\alpha t}) \\ &= \frac{\log(2)}{\alpha} + t. \end{aligned}$$

Moreover, since  $\log(1 + t) \leq t$  for  $t > 0$ , it holds  $\log(1 + e^{\alpha t}) \leq e^{\alpha t}$  for every  $t \in \mathbb{R}$ . Thus it holds that  $0 \leq \sigma_\alpha(t) \leq \frac{e^{\alpha t}}{\alpha}$  for every  $t < 0$ . Therefore  $\sigma_\alpha$  satisfies the second condition of Assumption 3.2 for  $\rho_1 = 1/\alpha, \rho_2 = \alpha, \rho_3 = 1, \rho_4 = \log(2)/\alpha$ .

## D. Proof of Theorem 3.4

To prove Theorem 3.4, we first show that Assumption 3.1 can be transported from the input to the output layer.

**Lemma D.1** *Let Assumption 3.1 hold for the training sample. Consider a standard deep CNN architecture which satisfies the following*

1. *The first layer is either convolutional or fully connected while all the other layers can be convolutional, fully connected or max-pooling*
2.  *$(\sigma_1, \dots, \sigma_L)$  are continuous and non-constant activation functions*

*Then for every layer  $1 \leq k \leq L$ , there exist a set of parameters of the first  $k$  layers  $(W_l, b_l)_{l=1}^k$  such that it holds  $f_k^p(x_i) \neq f_k^q(x_j)$  for every  $p, q \in [P_k], i, j \in [N], i \neq j$ . Moreover,  $(W_l, b_l)_{l=1}^k$  can be chosen in such a way that, except for max-pooling layers, all the weight matrices  $U_l = \mathcal{M}_l(W_l)$  have full rank for every  $1 \leq l \leq k$ .*

**Proof:** The high-level idea of the proof is the following: since Assumption 3.1 holds for the training inputs, one can first pick  $(W_1, b_1)$  such that one transports the property of Assumption 3.1 to the feature maps of the training data at the next layer and thus to all higher layers by induction.

Since our definition of a convolutional layer includes fully connected layer as a special case, it is sufficient to prove the result for the general convolutional structure. Since the first layer is a convolutional layer by our assumption, we denote by  $Q = [a^1, \dots, a^{T_1}] \in \mathbb{R}^{l_0 \times T_1}$  a matrix that contains the set of convolutional filters of the first layer. Note here that there are  $T_1$  filters, namely  $\{a^1, \dots, a^{T_1}\}$ , where each filter  $a^t \in \mathbb{R}^{l_0}$  for every  $t \in [T_1]$ . Let us define the set

$$\begin{aligned} S := & \{Q \in \mathbb{R}^{l_0 \times T_1} \mid \mathcal{M}_1(Q) \text{ has low rank}\} \cup \\ & \bigcup_{\substack{i \neq j \\ p, q \in [P_0] \\ t, t' \in [T_1]}} \left\{ Q \in \mathbb{R}^{l_0 \times T_1} \mid \langle a^t, x_i^p \rangle - \langle a^{t'}, x_j^q \rangle = 0 \right\}. \end{aligned}$$

Basically,  $S$  is the set of ‘‘true’’ parameter matrices of the first layer where the corresponding weight matrix  $\mathcal{M}_1(Q)$  has low rank or there exists two patches of two different training samples that have the same inner product with some corresponding two filters. By Assumption 3.1 it holds that  $x_i^p \neq x_j^q$  for every  $p, q \in [P_0], i \neq j$ , and thus the right hand side in the above formula of  $S$  is just the union of a finite number of hyperplanes which has Lebesgue measure zero. For the left hand side, it follows from Lemma 2.5 that the set of  $Q$  for which  $\mathcal{M}_1(Q)$  does not have full rank has measure zero. Thus the left hand side of  $S$  is a set of measure zero. Since  $S$  is the union of two measure zero sets, it has also

measure zero, and thus the complementary set  $\mathbb{R}^{l_0 \times T_1} \setminus S$  must be non-empty and we choose  $W_1 \in \mathbb{R}^{l_0 \times T_1} \setminus S$ .

Since  $\sigma_1$  is a continuous and non-constant function, there exists an interval  $(\mu_1, \mu_2)$  such that  $\sigma_1$  is bijective on  $(\mu_1, \mu_2)$ . We select and fix some matrix  $Q = [a^1, \dots, a^{T_1}] \in \mathbb{R}^{l_0 \times T_1} \setminus S$  and select some  $\beta \in (\mu_1, \mu_2)$ . Let  $\alpha > 0$  be a free variable and  $W_1 = [w_1^1, \dots, w_1^{T_1}]$  where  $w_1^t$  denotes the  $t$ -th filter of the first layer. Let us pick

$$w_1^t = \alpha Q_{:t} = \alpha a^t, \quad (b_1)_h = \beta, \quad \forall t \in [T_1], h \in [n_1].$$

It follows that  $W_1 = \alpha Q$  and thus  $\mathcal{M}_1(W_1) = \mathcal{M}_1(\alpha Q) = \alpha \mathcal{M}_1(Q)$  as  $\mathcal{M}_1$  is a linear map by our definition. Since  $Q \notin S$  by construction, it holds that  $\mathcal{M}_1(W_1)$  has full rank for every  $\alpha \neq 0$ . By Definition 2.1, it holds for every  $i \in [N], p \in [P_0], t \in [T_1], h = (p-1)T_1 + t$  that

$$f_1(x_i)_h = \sigma_1(\langle w_1^t, x_i^p \rangle + (b_1)_h) = \sigma_1(\alpha \langle a^t, x_i^p \rangle + \beta).$$

Since  $\beta \in (\mu_1, \mu_2)$ , one can choose a sufficiently small positive  $\alpha$  such that it holds  $\alpha \langle a^t, x_i^p \rangle + \beta \in (\mu_1, \mu_2)$  for every  $i \in [N], p \in [P_0], t \in [T_1]$ . Under this construction, we will show that every entry of  $f_1(x_i)$  must be different from every entry of  $f_1(x_j)$  for  $i \neq j$ . Indeed, let us compare  $f_1(x_i)_h$  and  $f_1(x_j)_v$  for some  $h = (p-1)T_1 + t, v = (q-1)T_1 + t'$  and  $i \neq j$ . It holds for sufficient small  $\alpha > 0$  that

$$\begin{aligned} & f_1(x_i)_h - f_1(x_j)_v \\ &= \sigma_1(\alpha \langle a^t, x_i^p \rangle + \beta) - \sigma_1(\alpha \langle a^{t'}, x_j^{q'} \rangle + \beta) \\ &\neq 0 \end{aligned} \quad (7)$$

where the last inequality follows from three facts. First, it holds  $\langle a^t, x_i^p \rangle \neq \langle a^{t'}, x_j^{q'} \rangle$  since  $Q \notin S$ . Second, for the chosen  $\alpha$  the values of the arguments of the activation function  $\sigma_1$  lie within  $(\mu_1, \mu_2)$ . Third, since  $\sigma_1$  is bijective on  $(\mu_1, \mu_2)$ , it maps different inputs to different outputs.

Now, since the entries of  $f_1(x_i)$  and that of  $f_1(x_j)$  are already pairwise different from each other, their corresponding patches must be also different from each other no matter how the patches are organized in the architecture, that is,

$$f_1^p(x_i) \neq f_1^q(x_j) \quad \forall p, q \in [P_1], i, j \in [N], i \neq j.$$

Now, if the network has only one layer, *i.e.*  $L = 1$ , then we are done. Otherwise, we will prove via induction that this property can be translated to any higher layer. In particular, suppose that one has already constructed  $(W_l, b_l)_{l=1}^k$  so that it holds

$$f_k(x_i)_h - f_k(x_j)_v \neq 0 \quad \forall h, v \in [n_k], i, j \in [N], i \neq j. \quad (8)$$

This is true for  $k = 1$  due to (7). We will show below that (8) can also hold at layer  $k + 1$ .

1. Case 1: Layer  $k + 1$  is convolutional or fully connected.

Since (8) holds for  $k$  by our induction assumption, it must hold that

$$f_k^p(x_i) \neq f_k^q(x_j) \quad \forall p, q \in [P_k], i, j \in [N], i \neq j.$$

which means Assumption 3.1 also holds for the set of features at layer  $k$ . Thus one can follow the similar construction as done for layer 1 above by considering the output of layer  $k$  as input to layer  $k + 1$ . Then one obtains that there exist  $(W_{k+1}, b_{k+1})$  where  $U_{k+1} = \mathcal{M}_{k+1}(W_{k+1})$  has full rank so that the similar inequality (7) now holds for layer  $k + 1$ , which thus implies (8) holds for  $k + 1$ .

2. Case 2: layer  $k + 1$  is max-pooling

By Definition 2.3, it holds  $n_{k+1} = P_k$  and one has for every  $p \in [P_k]$

$$f_{k+1}(x)_p = \max \left( (f_k^p(x))_1, \dots, (f_k^p(x))_{l_k} \right).$$

Since (8) holds at layer  $k$  by our induction assumption, every entry of every patch of  $f_k(x_i)$  must be different from every entry of every patch of  $f_k(x_j)$  for every  $i \neq j$ , that is,  $(f_k^p(x_i))_r \neq (f_k^q(x_j))_s$  for every  $r, s \in [l_k], p, q \in [P_k], i \neq j$ . Therefore, their maximum elements cannot be the same, that is,

$$f_{k+1}(x_i)_p \neq f_{k+1}(x_j)_q$$

for every  $p, q \in [n_{k+1}], i, j \in [N], i \neq j$ , which proves (8) for layer  $k + 1$ .

So far, we have proved that (8) holds for every  $1 \leq k \leq L$ . Thus it follows that for every layer  $k$ , there exists a set of parameters of the first  $k$  layers for which the patches at layer  $k$  of different training samples are pairwise different from each other, that is,  $f_k^p(x_i) \neq f_k^q(x_j)$  for every  $p, q \in [P_k], i \neq j$ . Moreover, except for max-pooling layers, all the weight matrices up to layer  $k$  have been chosen to have full rank.  $\square$

**Proof of Theorem 3.4** Let  $A = F_k = [f_k(x_1)^T, \dots, f_k(x_N)^T] \in \mathbb{R}^{N \times n_k}$ . Since our definition of a convolutional layer includes fully connected layer as a special case, it is sufficient to prove the result for convolutional structure. By Theorem's assumption, layer  $k$  is convolutional and thus it holds by Definition 2.1 that

$$A_{ij} = f_k(x_i)_j = \sigma \left( \langle w_k^t, f_{k-1}^p(x_i) \rangle + (b_k)_j \right)$$

for every  $i \in [N], t \in [T_k], p \in [P_{k-1}]$  and  $j = (p, t) := (p-1)T_k + t \in [n_k]$ .



In the following, we show that there exists a set of parameters of the network such that  $\text{rank}(A) = N$  and all the weight matrices  $U_l = \mathcal{M}_l(W_l)$  have full rank.

First, one observes that the subnetwork consisting of all the layers from the input layer till layer  $k-1$  satisfies the conditions of Lemma D.1. Thus by applying Lemma D.1 to this subnetwork, one obtains that there exist  $(W_l, b_l)_{l=1}^{k-1}$  for which all the matrices  $(U_l)_{l=1}^{k-1}$ , except for max-pooling layers, have full rank and it holds that  $f_{k-1}^p(x_i) \neq f_{k-1}^q(x_j)$  for every  $p, q \in [P_{k-1}], i \neq j$ . The main idea now is to fix the parameters of these layers and pick  $(W_k, b_k)$  such that  $U_k = \mathcal{M}_k(W_k)$  has full rank and it holds  $\text{rank}(A) = N$ . Let us define the set

$$S = \bigcup_{\substack{i \neq j \\ p \in [P_{k-1}]}} \{a \in \mathbb{R}^{l_{k-1}} \mid \langle a, f_{k-1}^p(x_i) - f_{k-1}^p(x_j) \rangle = 0\}.$$

From the above construction, it holds that  $f_{k-1}^p(x_i) \neq f_{k-1}^p(x_j)$  for every  $p \in [P_{k-1}], i \neq j$ , and thus  $S$  is the union of a finite number of hyperplanes which thus has measure zero. Let us denote by  $Q = [a^1, \dots, a^{T_k}] \in \mathbb{R}^{l_{k-1} \times T_k}$  a parameter matrix that contains all the convolutional filters of layer  $k$  in its columns. Pick  $a^t \in \mathbb{R}^{l_{k-1}} \setminus S$  for every  $t \in [T_k]$ , so that it holds that  $U_k = \mathcal{M}_k(Q)$  has full rank. Note here that such matrix  $Q$  always exists. Indeed,  $Q$  is chosen from a positive measure set as its columns (*i.e.*  $a^t$ ) are picked from a positive measure set. Moreover, the set of matrices  $Q$  for which  $\mathcal{M}_k(Q)$  has low rank has just measure zero due to Lemma 2.5. Thus there always exists at least one matrix  $Q$  so that all of its columns do not belong to  $S$  and that  $\mathcal{M}_k(Q)$  has full rank. In the rest of the proof, the value of matrix  $Q$  is fixed. Let  $\alpha \in \mathbb{R}$  be a free parameter. Since  $\sigma_k$  is a continuous and non-constant function, there exist a  $\beta \in \mathbb{R}$  such that  $\sigma_k(\beta) \neq 0$ . Let the value of  $\beta$  be fixed as well. We construct the convolutional filters  $W_k = [w_k^1, \dots, w_k^{T_k}]$  and the biases  $b_k \in \mathbb{R}^{n_k}$  of layer  $k$  as follows. For every  $p \in [P_{k-1}], t \in [T_k], j = (p, t)$ , we define

$$\begin{aligned} w_k^t &= -\alpha a^t, \\ (b_k)_j &= \alpha \langle a^t, f_{k-1}^p(x_j) \rangle + \beta. \end{aligned}$$

It follows that  $W_k = -\alpha Q$  and thus  $U_k = \mathcal{M}_k(W_k) = -\alpha \mathcal{M}_k(Q)$  as  $\mathcal{M}_k$  is a linear map. Moreover, since  $\mathcal{M}_k(Q)$  has full rank by construction, it holds that  $U_k$  has full rank for every  $\alpha \neq 0$ . As  $\alpha$  varies, we get a family of matrices  $A(\alpha) \in \mathbb{R}^{N \times n_k}$  where it holds for every  $i \in [N], j = (p, t) \in [n_k]$  that

$$\begin{aligned} A(\alpha)_{ij} &= \sigma_k \left( \langle w_k^t, f_{k-1}^p(x_i) \rangle + (b_k)_j \right) \\ &= \sigma_k \left( \alpha \langle a^t, f_{k-1}^p(x_j) - f_{k-1}^p(x_i) \rangle + \beta \right). \end{aligned} \quad (9)$$

Note that each row of  $A(\alpha)$  corresponds to one training sample and that permutations of the rows of  $A(\alpha)$  do not

change the rank of  $A(\alpha)$ . We construct a permutation  $\gamma$  of  $\{1, 2, \dots, N\}$  as follows. For every  $j = 1, 2, \dots, N$ , let  $(p, t)$  be the tuple determined by  $j$  (the inverse transformation for given  $j \in [n_k]$  is  $p = \left\lceil \frac{j}{T_k} \right\rceil$  and  $t = j - \left( \left\lceil \frac{j}{T_k} \right\rceil - 1 \right) T_k$ ) and define

$$\gamma(j) = \arg \min_{i \in \{1, 2, \dots, N\} \setminus \{\gamma(1), \dots, \gamma(j-1)\}} \langle a^t, f_{k-1}^p(x_i) \rangle.$$

Note that  $\gamma(j)$  is unique for every  $1 \leq j \leq N$  since  $a^t \notin S$ . It is clear that  $\gamma$  constructed as above is a permutation of  $\{1, 2, \dots, N\}$  since every time a different element is taken from the index set  $[N]$ . From the definition of  $\gamma(j)$ , it holds that for every  $j = (p, t) \in [N], i \in [N], i > j$  that

$$\langle a^t, f_{k-1}^p(x_{\gamma(j)}) \rangle < \langle a^t, f_{k-1}^p(x_{\gamma(i)}) \rangle.$$

We can relabel the training data according to the permutation so that w.l.o.g we can assume that  $\gamma$  is the identity permutation, that is,  $\gamma(j) = j$  for every  $j \in [N]$ , in which case it holds for every  $j = (p, t) \in [N], i \in [N], i > j$  that

$$\langle a^t, f_{k-1}^p(x_j) \rangle < \langle a^t, f_{k-1}^p(x_i) \rangle. \quad (10)$$

Under the above construction of  $(W_l, b_l)_{l=1}^k$ , we are ready to show that there exist  $\alpha$  for which  $\text{rank}(A(\alpha)) = N$ . Since  $\sigma_k$  satisfies Assumption 3.2, we consider the following cases.

1. Case 1: There are finite constants  $\mu_+, \mu_- \in \mathbb{R}$  s.t.  $\lim_{t \rightarrow -\infty} \sigma_k(t) = \mu_-$  and  $\lim_{t \rightarrow \infty} \sigma_k(t) = \mu_+$  and  $\mu_+ \mu_- = 0$ .

Let us consider the first case where  $\mu_- = 0$ . From (9) and (10) one obtains

$$\lim_{\alpha \rightarrow +\infty} A(\alpha)_{ij} = \begin{cases} \sigma_k(\beta) & j = i \\ \mu_- = 0 & i > j \\ \eta_{ij} & i < j \end{cases} \quad (11)$$

where  $\eta_{ij}$  is given for every  $i < j$  where  $j = (p, t)$  as

$$\eta_{ij} = \begin{cases} \mu_-, & \langle a^t, f_{k-1}^p(x_j) - f_{k-1}^p(x_i) \rangle < 0 \\ \mu_+, & \langle a^t, f_{k-1}^p(x_j) - f_{k-1}^p(x_i) \rangle > 0 \end{cases}$$

Note that  $\eta_{ij}$  cannot be zero for  $i \neq j$  because  $a^t \notin S$ . In the following, let us denote  $A(\alpha)_{1:N, 1:N}$  as a submatrix of  $A(\alpha)$  that consists of the first  $N$  rows and columns. By the Leibniz-formula one has

$$\begin{aligned} &\det(A(\alpha)_{1:N, 1:N}) \\ &= \sigma_k(\beta)^N + \sum_{\pi \in S_N \setminus \{\gamma\}} \text{sign}(\pi) \prod_{j=1}^N A(\alpha)_{\pi(j)j} \end{aligned} \quad (12)$$

where  $S_N$  is the set of all  $N!$  permutations of the set  $\{1, \dots, N\}$  and  $\gamma$  is the identity permutation. Now, one observes that for every permutation  $\pi \neq \gamma$ , there always exists at least one component  $j$  where  $\pi(j) > j$  in which case it follows from (11) that

$$\lim_{\alpha \rightarrow \infty} \prod_{j=1}^N A(\alpha)_{\pi(j)j} = 0.$$

Since there are only finitely many such terms in (12), one obtains

$$\lim_{\alpha \rightarrow \infty} \det(A(\alpha)_{1:N,1:N}) = \sigma_k(\beta)^N \neq 0$$

where the last inequality follows from our choice of  $\beta$ . Since  $\det(A(\alpha)_{1:N,1:N})$  is a continuous function of  $\alpha$ , there exists  $\alpha_0 \in \mathbb{R}$  such that for every  $\alpha \geq \alpha_0$  it holds  $\det(A(\alpha)_{1:N,1:N}) \neq 0$  and thus  $\text{rank}(A(\alpha)_{1:N,1:N}) = N$  which further implies  $\text{rank}(A(\alpha)) = N$ . Thus the corresponding set of feature vectors  $\{f_k(x_1), \dots, f_k(x_N)\}$  are linearly independent.

For the case where  $\mu_+ = 0$ , one can argue similarly. The only difference is that one considers now the limit for  $\alpha \rightarrow -\infty$ . In particular, (9) and (10) lead to

$$\lim_{\alpha \rightarrow -\infty} A(\alpha)_{ij} = \begin{cases} \sigma_k(\beta) & i = j \\ \mu_+ = 0 & i > j \\ \eta_{ij} = 0 & i < j. \end{cases}$$

For every permutation  $\pi \neq \gamma$  there always exists at least one component  $j$  where  $\pi(j) > j$ , in which case it holds that

$$\lim_{\alpha \rightarrow -\infty} \prod_{j=1}^N A(\alpha)_{\pi(j)j} = 0.$$

and thus it follows from the Leibniz formula that

$$\lim_{\alpha \rightarrow -\infty} \det(A(\alpha)_{1:N,1:N}) = \sigma_k(\beta)^N \neq 0.$$

Since  $\det(A(\alpha)_{1:N,1:N})$  is a continuous function of  $\alpha$ , there exists  $\alpha_0 \in \mathbb{R}$  such that for every  $\alpha \leq \alpha_0$  it holds  $\det(A(\alpha)_{1:N,1:N}) \neq 0$  and thus  $\text{rank}(A(\alpha)_{1:N,1:N}) = N$  which further implies  $\text{rank}(A(\alpha)) = N$ . Thus the set of feature vectors at layer  $k$  are linearly independent.

2. **Case 2:** There are positive constants  $\rho_1, \rho_2, \rho_3, \rho_4$  s.t.  $|\sigma_k(t)| \leq \rho_1 e^{\rho_2 t}$  for  $t < 0$  and  $|\sigma_k(t)| \leq \rho_3 t + \rho_4$  for  $t \geq 0$ .

Our proof strategy is essentially similar to the previous case. Indeed, for every permutation  $\pi \neq \gamma$  there always exist at least one component  $j =$

$(p, t) \in [N]$  where  $\pi(j) > j$  in which case  $\delta_j := \langle a^t, f_{k-1}^p(x_j) - f_{k-1}^p(x_{\pi(j)}) \rangle < 0$  due to (10). For sufficiently large  $\alpha > 0$ , it holds that  $\alpha \delta_j + \beta < 0$  and thus one obtains from (9) that

$$|A(\alpha)_{\pi(j)j}| = |\sigma_k(\alpha \delta_j + \beta)| \leq \rho_1 e^{\rho_2 \beta} e^{-\alpha \rho_2 |\delta_j|}.$$

If  $\pi(j) = j$  then  $|A(\alpha)_{\pi(j)j}| = |\sigma_k(\beta)|$  which is a constant. For  $\pi(j) < j$ , one notices that  $\delta_j := \langle a^t, f_{k-1}^p(x_j) - f_{k-1}^p(x_{\pi(j)}) \rangle$  can only be either positive or negative as  $a^t \notin S$ . In this case, if  $\delta_j < 0$  then it can be bounded by the similar exponential term as above for sufficiently large  $\alpha$ . Otherwise it holds  $\alpha \delta_j + \beta > 0$  for sufficiently large  $\alpha > 0$  and we get

$$|A(\alpha)_{\pi(j)j}| = |\sigma(\alpha \delta_j + \beta)| \leq \rho_3 \delta_j \alpha + \rho_3 \beta + \rho_4.$$

Overall, for sufficiently large  $\alpha > 0$ , there must exist positive constants  $P, Q, R, S, T$  such that it holds for every  $\pi \in S_N \setminus \{\gamma\}$  that

$$\left| \prod_{j=1}^N A(\alpha)_{\pi(j)j} \right| \leq R(P\alpha + Q)^S e^{-\alpha T}.$$

The upper bound goes to zero as  $\alpha$  goes to  $\infty$ . This combined with the Leibniz formula from (12), we get  $\lim_{\alpha \rightarrow \infty} \det(A(\alpha)_{1:N,1:N}) = \sigma_k(\beta)^N \neq 0$ . Since  $\det(A(\alpha)_{1:N,1:N})$  is a continuous function of  $\alpha$ , there exists  $\alpha_0 \in \mathbb{R}$  such that for every  $\alpha \geq \alpha_0$  it holds  $\det(A(\alpha)_{1:N,1:N}) \neq 0$  and thus  $\text{rank}(A(\alpha)_{1:N,1:N}) = N$  which implies  $\text{rank}(A(\alpha)) = N$ . Thus the set of feature vectors at layer  $k$  are linearly independent.

Overall, we have shown that there always exist  $(W_l, b_l)_{l=1}^k$  such that the set of feature vectors  $\{f_k(x_1), \dots, f_k(x_N)\}$  at layer  $k$  are linearly independent. Moreover,  $(W_l, b_l)_{l=1}^k$  have been chosen so that all the weight matrices  $U_l = \mathcal{M}_l(W_l)$ , except for max-pooling layers, have full rank for every  $1 \leq l \leq k$ .

## E. Proof of Theorem 3.5

Any linear function is real analytic and the set of real analytic functions is closed under addition, multiplication and composition, see e.g. Prop. 2.2.2 and Prop. 2.2.8 in (Krantz & Parks, 2002). As we assume that all the activation functions of the first  $k$  layers are real analytic, we get that the function  $f_k$  is a real analytic function of  $(W_l, b_l)_{l=1}^k$  as it is the composition of real analytic functions. Now, we recall from our definition that  $F_k = [f_k(x_1), \dots, f_k(x_N)]^T \in \mathbb{R}^{N \times n_k}$  is the output matrix at layer  $k$  for all training samples. One observes that the set of low rank matrices  $F_k$  can be characterized by a system of equations such that all the  $\binom{n_k}{N}$  determinants of all  $N \times N$  sub-matrices of  $F_k$  are zero. As the determinant is a polynomial in the entries of

the matrix and thus an analytic function of the entries and composition of analytic functions are again analytic, we conclude that each determinant is an analytic function of the network parameters of the first  $k$  layers. By Theorem 3.4, there exists at least one set of parameters of the first  $k$  layers such that one of these determinant functions is not identically zero and thus by Lemma A.1, the set of network parameters where this determinant is zero has Lebesgue measure zero. But as all submatrices need to have low rank in order that  $\text{rank}(F_k) < N$ , it follows that the set of parameters where  $\text{rank}(F_k) < N$  has Lebesgue measure zero.

## F. Proof of Corollary 3.6

Since the network satisfies the conditions of Theorem 3.4 for  $k = L - 1$ , there exists a set of parameters  $(W_l, b_l)_{l=1}^{L-1}$  such that  $\text{rank}(F_{L-1}) = N$ . Let  $F_L = [f_L(x_1), \dots, f_L(x_N)]^T \in \mathbb{R}^N$  then it follows that  $F_L = F_{L-1}\lambda$ . Pick  $\lambda = F_{L-1}^T(F_{L-1}F_{L-1}^T)^{-1}y$  then it holds  $F_L = F_{L-1}\lambda = y$ .

## G. Proof of Lemma 4.2

One can see that

$$\mathcal{P} \setminus S_k \subseteq \left\{ (W_l, b_l)_{l=1}^L \mid \text{rank}(F_k) < N \right\} \cup \left\{ (W_l, b_l)_{l=1}^L \mid U_l \text{ has low rank for some layer } l \right\}.$$

By Theorem 3.5, it holds that the set  $\left\{ (W_l, b_l)_{l=1}^L \mid \text{rank}(F_k) < N \right\}$  has Lebesgue measure zero. Moreover, it follows from Lemma 2.5 that the set  $\left\{ (W_l, b_l)_{l=1}^L \mid U_l \text{ has low rank for some layer } l \right\}$  also has measure zero. Thus,  $\mathcal{P} \setminus S_k$  has Lebesgue measure zero.

## H. Proof of Lemma 4.3

To prove Lemma 4.3, we first derive standard backpropagation in Lemma H.1. In the following we use the Hadamard product  $\circ$ , which for  $A, B \in \mathbb{R}^{m \times n}$  is defined as  $A \circ B \in \mathbb{R}^{m \times n}$  with  $(A \circ B)_{ij} = A_{ij}B_{ij}$ . Let  $\delta_{kj}(x_i) = \frac{\partial \Phi}{\partial g_{kj}(x_i)}$  be the derivative of  $\Phi$  w.r.t. the value of unit  $j$  at layer  $k$  evaluated at a single sample  $x_i$ . We arrange these vectors for all training samples into a single matrix  $\Delta_k = [\delta_{k:}(x_1), \dots, \delta_{k:}(x_N)]^T \in \mathbb{R}^{N \times n_k}$ . The following lemma is a slight modification of Lemma 2.1 in (Nguyen & Hein, 2017) for which we provide the proof for completeness.

**Lemma H.1** *Given some hidden layer  $1 \leq k \leq L - 1$ . Let  $(\sigma_{k+1}, \dots, \sigma_{L-1})$  be differentiable. Then the following hold:*

$$1. \Delta_l = \begin{cases} F_L - Y, & l = L \\ (\Delta_{l+1}U_{l+1}^T) \circ \sigma_l'(G_l), & k+1 \leq l \leq L-1 \end{cases}$$

$$2. \nabla_{U_l} \Phi = F_{l-1}^T \Delta_l, \forall k+1 \leq l \leq L$$

**Proof:**

1. By definition, it holds for every  $i \in [N], j \in [n_L]$  that

$$(\Delta_L)_{ij} = \delta_{Lj}(x_i) = \frac{\partial \Phi}{\partial g_{Lj}(x_i)} = f_{Lj}(x_i) - y_{ij}$$

and hence,  $\Delta_L = F_L - Y$ .

For every  $k+1 \leq l \leq L-1$ , the output of the network for a single training sample can be written as the composition of differentiable functions (*i.e.* the outputs of all layers from  $l+1$  till the output layer), and thus the chain rule yields for every  $i \in [N], j \in [n_l]$  that

$$\begin{aligned} (\Delta_l)_{ij} &= \delta_{lj}(x_i) \\ &= \frac{\partial \Phi}{\partial g_{lj}(x_i)} \\ &= \sum_{s=1}^{n_{l+1}} \frac{\partial \Phi}{\partial g_{(l+1)s}(x_i)} \frac{\partial g_{(l+1)s}(x_i)}{\partial f_{lj}(x_i)} \frac{\partial f_{lj}(x_i)}{\partial g_{lj}(x_i)} \\ &= \sum_{s=1}^{n_{l+1}} \delta_{(l+1)s}(x_i) (U_{l+1})_{js} \sigma'(g_{lj}(x_i)) \\ &= \sum_{s=1}^{n_{l+1}} (\Delta_{(l+1)})_{is} (U_{l+1})_{sj}^T \sigma'((G_l)_{ij}) \end{aligned}$$

and hence  $\Delta_l = (\Delta_{l+1}U_{l+1}^T) \circ \sigma'(G_l)$ .

2. For every  $k+1 \leq l \leq L-1, r \in [n_{l-1}], s \in [n_l]$ , one has

$$\begin{aligned} \frac{\partial \Phi}{\partial (U_l)_{rs}} &= \sum_{i=1}^N \frac{\partial \Phi}{\partial g_{ls}(x_i)} \frac{\partial g_{ls}(x_i)}{\partial (U_l)_{rs}} \\ &= \sum_{i=1}^N \delta_{ls}(x_i) f_{(l-1)r}(x_i) \\ &= \sum_{i=1}^N (F_{l-1}^T)_{ri} (\Delta_l)_{is} \\ &= (F_{l-1}^T \Delta_l)_{rs} \end{aligned}$$

and hence  $\nabla_{U_l} \Phi = F_{l-1}^T \Delta_l$ . □

The following straightforward inequalities are also helpful to prove Lemma 4.3. Let  $\lambda_{\min}(\cdot)$  and  $\lambda_{\max}(\cdot)$  denotes the smallest and largest eigenvalue of a matrix.

**Lemma H.2** *Let  $A \in \mathbb{R}^{m \times n}$  with  $m \geq n$ . Then it holds  $\sigma_{\max}(A) \|x\|_2 \geq \|Ax\|_2 \geq \sigma_{\min}(A) \|x\|_2$  for every  $x \in \mathbb{R}^n$ .*

**Proof:** Since  $m \geq n$ , it holds that  $\sigma_{\min}(A) = \sqrt{\lambda_{\min}(A^T A)} = \sqrt{\min \frac{x^T A^T A x}{x^T x}} = \min \frac{\|Ax\|_2}{\|x\|_2}$  and thus  $\sigma_{\min}(A) \leq \frac{\|Ax\|_2}{\|x\|_2}$  for every  $x \in \mathbb{R}^n$ . Similarly, it holds  $\sigma_{\max}(A) = \sqrt{\lambda_{\max}(A^T A)} = \sqrt{\max \frac{x^T A^T A x}{x^T x}} = \max \frac{\|Ax\|_2}{\|x\|_2}$  and thus  $\sigma_{\max}(A) \geq \frac{\|Ax\|_2}{\|x\|_2}$  for every  $x \in \mathbb{R}^n$ .  $\square$

**Lemma H.3** Let  $A \in \mathbb{R}^{m \times n}$ ,  $B \in \mathbb{R}^{n \times p}$  with  $m \geq n$ . Then it holds  $\sigma_{\max}(A) \|B\|_F \geq \|AB\|_F \geq \sigma_{\min}(A) \|B\|_F$ .

**Proof:** Since  $m \geq n$ , it holds that  $\lambda_{\min}(A^T A) = \sigma_{\min}(A)^2$  and  $\lambda_{\max}(A^T A) = \sigma_{\max}(A)^2$ . Thus we have  $\|AB\|_F^2 = \text{tr}(B^T A^T A B) \geq \lambda_{\min}(A^T A) \text{tr}(B^T B) = \sigma_{\min}(A)^2 \|B\|_F^2$ . Similarly, it holds  $\|AB\|_F^2 = \text{tr}(B^T A^T A B) \leq \lambda_{\max}(A^T A) \text{tr}(B^T B) = \sigma_{\max}(A)^2 \|B\|_F^2$ .  $\square$

**Proof of Lemma 4.3** We first prove the lower bound. Let  $\mathbb{I}_m$  denotes an  $m$ -by- $m$  identity matrix and  $\otimes$  the Kronecker product. From Lemma H.1 it holds  $\nabla_{U_{k+1}} \Phi = F_L^T \Delta_{k+1}$  and thus

$$\text{vec}(\nabla_{U_{k+1}} \Phi) = (\mathbb{I}_{n_{k+1}} \otimes F_k^T) \text{vec}(\Delta_{k+1}).$$

It follows that

$$\begin{aligned} \|\nabla_{U_{k+1}} \Phi\|_F &= \|(\mathbb{I}_{n_{k+1}} \otimes F_k^T) \text{vec}(\Delta_{k+1})\|_2 \\ &\geq \sigma_{\min}(F_k) \|\text{vec}(\Delta_{k+1})\|_2 \\ &= \sigma_{\min}(F_k) \|\Delta_{k+1}\|_F \end{aligned} \quad (13)$$

where the inequality follows from Lemma H.2 for the matrix  $(\mathbb{I}_{n_{k+1}} \otimes F_k^T) \in \mathbb{R}^{n_k n_{k+1} \times N n_{k+1}}$  with  $n_k \geq N$  by Assumption 4.1. Using Lemma H.1 again, one has

$$\begin{aligned} \|\Delta_{k+1}\|_F &= \|(\Delta_{k+2} U_{k+2}^T) \circ \sigma'_{k+1}(G_{k+1})\|_F \\ &\geq \|\sigma'_{k+1}(G_{k+1})\|_{\min} \|\Delta_{k+2} U_{k+2}^T\|_F \\ &= \|\sigma'_{k+1}(G_{k+1})\|_{\min} \|U_{k+2} \Delta_{k+2}^T\|_F \\ &\geq \|\sigma'_{k+1}(G_{k+1})\|_{\min} \sigma_{\min}(U_{k+2}) \|\Delta_{k+2}\|_F \end{aligned}$$

where the last inequality follows from Lemma H.3 for the matrices  $U_{k+2} \in \mathbb{R}^{n_{k+1} \times n_{k+2}}$  and  $\Delta_{k+2}^T$  with  $n_{k+1} \geq n_{k+2}$  by Assumption 4.1. By repeating this for  $\|\Delta_{k+2}\|_F, \dots, \|\Delta_{L-1}\|_F$ , one gets

$$\begin{aligned} \|\Delta_{k+1}\|_F &\geq \left( \prod_{l=k+1}^{L-1} \|\sigma'_l(G_l)\|_{\min} \sigma_{\min}(U_{l+1}) \right) \|\Delta_L\|_F \\ &= \left( \prod_{l=k+1}^{L-1} \|\sigma'_l(G_l)\|_{\min} \sigma_{\min}(U_{l+1}) \right) \|F_L - Y\|_F \end{aligned} \quad (14)$$

From (13), (14), one obtains

$$\|\nabla_{U_{k+1}} \Phi\|_F \geq \sigma_{\min}(F_k) \left( \prod_{l=k+1}^{L-1} \|\sigma'_l(G_l)\|_{\min} \sigma_{\min}(U_{l+1}) \right) \|F_L - Y\|_F$$

which proves the lower bound.

The proof for upper bound is similar. Indeed one has

$$\begin{aligned} \|\nabla_{U_{k+1}} \Phi\|_F &= \|(\mathbb{I}_{n_{k+1}} \otimes F_k^T) \text{vec}(\Delta_{k+1})\|_2 \\ &\leq \sigma_{\max}(F_k) \|\text{vec}(\Delta_{k+1})\|_2 \\ &= \sigma_{\max}(F_k) \|\Delta_{k+1}\|_F \end{aligned} \quad (15)$$

where the inequality follows from Lemma H.2 Now, one has

$$\begin{aligned} \|\Delta_{k+1}\|_F &= \|(\Delta_{k+2} U_{k+2}^T) \circ \sigma'_{k+1}(G_{k+1})\|_F \\ &\leq \|\sigma'_{k+1}(G_{k+1})\|_{\max} \|\Delta_{k+2} U_{k+2}^T\|_F \\ &= \|\sigma'_{k+1}(G_{k+1})\|_{\max} \|U_{k+2} \Delta_{k+2}^T\|_F \\ &\leq \|\sigma'_{k+1}(G_{k+1})\|_{\max} \sigma_{\max}(U_{k+2}) \|\Delta_{k+2}\|_F \end{aligned}$$

where the last inequality follows from Lemma H.3. By repeating this chain of inequalities for  $\|\Delta_{k+2}\|_F, \dots, \|\Delta_{L-1}\|_F$ , one obtains:

$$\begin{aligned} \|\Delta_{k+1}\|_F &\leq \left( \prod_{l=k+1}^{L-1} \|\sigma'_l(G_l)\|_{\max} \sigma_{\max}(U_{l+1}) \right) \|\Delta_L\|_F \\ &= \left( \prod_{l=k+1}^{L-1} \|\sigma'_l(G_l)\|_{\max} \sigma_{\max}(U_{l+1}) \right) \|F_L - Y\|_F. \end{aligned} \quad (16)$$

From (15), (16), one obtains that

$$\|\nabla_{U_{k+1}} \Phi\|_F \leq \sigma_{\max}(F_k) \left( \prod_{l=k+1}^{L-1} \|\sigma'_l(G_l)\|_{\max} \sigma_{\max}(U_{l+1}) \right) \|F_L - Y\|_F$$

which proves the upper bound.

## I. Proof of Theorem 4.5

- Since layer  $k+1$  is fully connected, it holds at every critical point in  $S_k$  that  $\nabla_{W_{k+1}} \Phi = 0 = \nabla_{U_{k+1}} \Phi$ . This combined with Theorem 4.4 yields the result.
- One basically needs to show that there exist  $(W_l, b_l)_{l=1}^L$  such that it holds:  $\Phi((W_l, b_l)_{l=1}^L) = 0$ ,  $\text{rank}(F_k) = N$  and  $U_l = \mathcal{M}_l(W_l)$  has full rank  $\forall l \in [k+2, L]$ . Note that the last two conditions are fulfilled by the fact that  $(W_l, b_l)_{l=1}^L \in S_k$ .



By Assumption 4.1, the subnetwork consisting of the first  $k$  layers satisfies the condition of Theorem 3.4. Thus by applying Theorem 3.4 to this subnetwork, one obtains that there exist  $(W_l, b_l)_{l=1}^k$  such that  $\text{rank}(F_k) = N$ . In the following, we fix these layers and show how to pick  $(W_l, b_l)_{l=k+1}^L$  such that  $F_L = Y$ . The main idea now is to make the output of all the training samples of the same class become identical at layer  $k+1$  and thus they will have the same network output. Since there are only  $m$  classes, there would be only  $m$  distinct outputs for all the training samples at layer  $L-1$ . Thus if one can make these  $m$  distinct outputs become linearly independent at layer  $L-1$  then there always exists a weight matrix  $W_L$  that realizes the target output  $Y$  as the last layer is just a linear map by assumption. Moreover, we will show that, except for max-pooling layers, all the parameters of other layers in the network can be chosen in such a way that all the weight matrices  $(U_l)_{l=k+2}^L$  achieve full rank. Our proof details are as follows.

Case 1:  $k = L - 1$

It holds  $\text{rank}(F_{L-1}) = N$ . Pick  $b_L = 0$  and  $W_L = F_{L-1}^T (F_{L-1} F_{L-1}^T)^{-1} Y$ . Since the output layer is fully connected, it follows from Definition 2.2 that  $F_L = F_{L-1} W_L + \mathbf{1}_N b_L^T = Y$ . Since  $\text{rank}(F_k) = N$  and the full rank condition on  $(W_l)_{l=k+2}^L$  is not active when  $k = L - 1$ , it holds that  $(W_l, b_l)_{l=1}^L \in S_k$  which finishes the proof.

Case 2:  $k = L - 2$

It holds  $\text{rank}(F_{L-2}) = N$ . Let  $A \in \mathbb{R}^{m \times n_{L-1}}$  be a full row rank matrix such that  $A_{ij} \in \text{range}(\sigma_{L-1})$ . Note that  $n_{L-1} \geq n_L = m$  due to Assumption 4.1. Let  $D \in \mathbb{R}^{N \times n_{L-1}}$  be a matrix satisfying  $D_{i:} = A_{j:}$  whenever  $x_i$  belongs to class  $j$  for every  $i \in [N], j \in [m]$ . By construction,  $F_{L-2}$  has full row rank, thus we can pick  $b_{L-1} = 0, W_{L-1} = F_{L-2}^T (F_{L-2} F_{L-2}^T)^{-1} \sigma_{L-1}^{-1}(D)$ . Since layer  $L-1$  is fully connected by assumption, it follows from Definition 2.2 that  $F_{L-1} = \sigma_{L-1}(F_{L-2} W_{L-1} + \mathbf{1}_N b_{L-1}^T) = D$  and thus  $(F_{L-1})_{i:} = D_{i:} = A_{j:}$  whenever  $x_i$  belongs to class  $j$ .

So far, our construction of the first  $L-1$  layers has led to the fact that all the training samples belonging to the same class will have identical output at layer  $L-1$ . Since  $A$  has full row rank by construction, we can pick for the last layer  $b_L = 0, W_L = A^T (A A^T)^{-1} Z$  where  $Z \in \mathbb{R}^{m \times m}$  is our class embedding matrix with  $\text{rank}(Z) = m$ . One can easily check that  $A W_L = Z$  and that  $F_L = F_{L-1} W_L + \mathbf{1}_N b_L^T = F_{L-1} W_L$  where the later follows from Definition 2.2 as the output layer is fully connected. Now one can verify that  $F_L = Y$ .

Indeed, whenever  $x_i$  belongs to class  $j$  one has

$$(F_L)_{i:} = (F_{L-1})_{i:}^T W_L = (A)_{j:}^T W_L = Z_{j:} = Y_{i:}.$$

Moreover, since  $\text{rank}(F_k) = N$  and  $\text{rank}(W_L) = \text{rank}(A^T (A A^T)^{-1} Z) = m$ , it holds that  $(W_l, b_l)_{l=1}^L \in S_k$ . Therefore, there exists  $(W_l, b_l)_{l=1}^L \in S_k$  with  $\Phi((W_l, b_l)_{l=1}^L) = 0$ .

Case 3:  $k \leq L - 3$

It holds  $\text{rank}(F_k) = N$ . Let  $E \in \mathbb{R}^{m \times n_{k+1}}$  be any matrix such that  $E_{ij} \in \text{range}(\sigma_{k+1})$  and  $E_{ip} \neq E_{jq}$  for every  $1 \leq i \neq j \leq N, 1 \leq p, q \leq n_{k+1}$ . Let  $D \in \mathbb{R}^{N \times n_{k+1}}$  satisfies  $D_{i:} = E_{j:}$  for every  $x_i$  from class  $j$ . Pick  $b_{k+1} = 0, W_{k+1} = F_k^T (F_k F_k^T)^{-1} \sigma_{k+1}^{-1}(D)$ . Note that the matrix is invertible as  $F_k$  has been chosen to have full row rank. Since layer  $k+1$  is fully connected by our assumption, it follows from Definition 2.2 that  $F_{k+1} = \sigma_{k+1}(F_k W_{k+1} + \mathbf{1}_N b_{k+1}^T) = \sigma_{k+1}(F_k W_{k+1}) = D$  and thus it holds

$$(F_{k+1})_{i:} = D_{i:} = E_{j:} \quad (17)$$

for every  $x_i$  from class  $j$ .

So far, our construction has led to the fact that all training samples belonging to the same class have identical output at layer  $k+1$ . The idea now is to see  $E$  as a new training data matrix of a subnetwork consisting of all layers from  $k+1$  till the output layer  $L$ . In particular, layer  $k+1$  can be seen as the input layer of this subnetwork and similarly, layer  $L$  can be seen as the output layer. Moreover, every row of  $E \in \mathbb{R}^{m \times n_{k+1}}$  can be seen as a new training sample to this subnetwork. One can see that this subnet together with the training data matrix  $E$  satisfy the conditions of Theorem 3.4 at the last hidden layer  $L-1$ . In particular, it holds that

- The rows of  $E \in \mathbb{R}^{m \times n_{k+1}}$  are componentwise different from each other, and thus the input patches must be also different from each other, and thus  $E$  satisfies Assumption 3.1
- Every layer from  $k+1$  till  $L-1$  is convolutional or fully connected due to Assumption 4.1
- The width of layer  $L-1$  is larger than the number of samples due to Assumption 4.1, that is,  $n_{L-1} \geq n_L = m$
- $(\sigma_{k+2}, \dots, \sigma_{L-1})$  satisfy Assumption 3.2 due to Assumption 4.1

By applying Theorem 3.4 to this subnetwork and training data  $E$ , we obtain that there must exist  $(W_l, b_l)_{l=k+2}^{L-1}$  for which all the weight matrices  $(U_l)_{l=k+2}^{L-1}$  have full rank such that the set of corresponding  $m$  outputs at layer  $L-1$  are linearly independent. In particular, let  $A \in \mathbb{R}^{m \times n_{L-1}}$  be the corresponding outputs of  $E$  through this subnetwork then

it holds that  $\text{rank}(A) = m$ . Intuitively, if one feeds  $E_j$  as an input at layer  $k + 1$  then one would get  $A_j$  as an output at layer  $L - 1$ . This combined with (17) leads to the fact that if one now feeds  $(F_{k+1})_{i:} = E_j$  as an input at layer  $k + 1$  then one would get at layer  $L - 1$  the output  $(F_{L-1})_{i:} = A_j$  whenever  $x_i$  belongs to class  $j$ .

Last, we pick  $b_L = 0, W_L = A^T(AA^T)^{-1}Z$ . It follows that  $AW_L = Z$ . Since the output layer  $L$  is fully connected, it holds from Definition 2.2 that  $F_L = F_{L-1}W_L + \mathbf{1}_N b_L^T = F_{L-1}W_L$ .

One can verify now that  $F_L = Y$ . Indeed, for every sample  $x_i$  from class  $j$  it holds that

$$(F_L)_{i:} = (F_{L-1})_{i:}^T W_L = A_j^T W_L = Z_{j:} = Y_{i:}.$$

Overall, we have shown that  $\Phi = 0$ . In addition, it holds  $\text{rank}(F_k) = N$  from the construction of the first  $k$  layers. All the matrices  $(U_l)_{l=k+2}^{L-1}$  have full rank by the construction of the subnetwork from  $k + 1$  till  $L$ . Moreover,  $U_L = W_L$  also has full rank since  $\text{rank}(W_L) = \text{rank}(A^T(AA^T)^{-1}Z) = m$ . Therefore it holds  $(W_l, b_l)_{l=1}^L \in S_k$ .
